# Supplementary material for: Repurposing bromocriptine for Aβ metabolism in Alzheimer’s disease (REBRAnD) study: randomised placebo-controlled double-blind comparative trial and open-label extension trial to investigate the safety and efficacy of bromocriptine in Alzheimer’s disease with presenilin 1 (PSEN1) mutations
Source: PubMed Central journal article supplement — BMJ Open. 2021 Jun 30;11(6):e051343. doi: 10.1136/bmjopen-2021-051343 (PMC8246358; doi:10.1136/bmjopen-2021-051343), 2021-06-30
Supplement: bmjopen-2021-051343.draft_revisions.pdf [file bmjopen-2021-051343.draft_revisions.pdf]

# BMJ Open

BMJ Open is committed to open peer review. As part of this commitment we make the peer review history of every article we publish publicly available.

When an article is published we post the peer reviewers' comments and the authors' responses online. We also post the versions of the paper that were used during peer review. These are the versions that the peer review comments apply to.

The versions of the paper that follow are the versions that were submitted during the peer review process. They are not the versions of record or the final published versions. They should not be cited or distributed as the published version of this manuscript.

BMJ Open is an open access journal and the full, final, typeset and author-corrected version of record of the manuscript is available on our site with no access controls, subscription charges or pay-per-view fees (<http://bmjopen.bmj.com>).

If you have any questions on BMJ Open's open peer review process please email [info.bmjopen@bmj.com](mailto:info.bmjopen@bmj.com)

# BMJ Open

## Repurposing bromocriptine for A $\beta$ metabolism in Alzheimer's disease (REBRAnD) study: Randomised Placebo-Controlled Double-Blind Comparative Trial and Open-Label Extension Trial to Investigate the Safety and Efficacy of Bromocriptine in Alzheimer's Disease with Presenilin 1 (PSEN1) Mutations

|                               |                                                                                                                                                                                                                                                                                                                                                                                                                                                                                                                                                                                                                                                                                                                                                                                                                                                                                                                                                                                                                                                                                                                                                                                                                                                                                                                                                                                                                                                                                                                                                                                                                                                                                                                                                                                                                                                                                                                                                                                                                                                                                                                                                                                         |
|-------------------------------|-----------------------------------------------------------------------------------------------------------------------------------------------------------------------------------------------------------------------------------------------------------------------------------------------------------------------------------------------------------------------------------------------------------------------------------------------------------------------------------------------------------------------------------------------------------------------------------------------------------------------------------------------------------------------------------------------------------------------------------------------------------------------------------------------------------------------------------------------------------------------------------------------------------------------------------------------------------------------------------------------------------------------------------------------------------------------------------------------------------------------------------------------------------------------------------------------------------------------------------------------------------------------------------------------------------------------------------------------------------------------------------------------------------------------------------------------------------------------------------------------------------------------------------------------------------------------------------------------------------------------------------------------------------------------------------------------------------------------------------------------------------------------------------------------------------------------------------------------------------------------------------------------------------------------------------------------------------------------------------------------------------------------------------------------------------------------------------------------------------------------------------------------------------------------------------------|
| Journal:                      | <i>BMJ Open</i>                                                                                                                                                                                                                                                                                                                                                                                                                                                                                                                                                                                                                                                                                                                                                                                                                                                                                                                                                                                                                                                                                                                                                                                                                                                                                                                                                                                                                                                                                                                                                                                                                                                                                                                                                                                                                                                                                                                                                                                                                                                                                                                                                                         |
| Manuscript ID                 | bmjopen-2021-051343                                                                                                                                                                                                                                                                                                                                                                                                                                                                                                                                                                                                                                                                                                                                                                                                                                                                                                                                                                                                                                                                                                                                                                                                                                                                                                                                                                                                                                                                                                                                                                                                                                                                                                                                                                                                                                                                                                                                                                                                                                                                                                                                                                     |
| Article Type:                 | Protocol                                                                                                                                                                                                                                                                                                                                                                                                                                                                                                                                                                                                                                                                                                                                                                                                                                                                                                                                                                                                                                                                                                                                                                                                                                                                                                                                                                                                                                                                                                                                                                                                                                                                                                                                                                                                                                                                                                                                                                                                                                                                                                                                                                                |
| Date Submitted by the Author: | 17-Mar-2021                                                                                                                                                                                                                                                                                                                                                                                                                                                                                                                                                                                                                                                                                                                                                                                                                                                                                                                                                                                                                                                                                                                                                                                                                                                                                                                                                                                                                                                                                                                                                                                                                                                                                                                                                                                                                                                                                                                                                                                                                                                                                                                                                                             |
| Complete List of Authors:     | <p>Kondo, Takayuki; Kyoto University Center for iPS Cell Research and Application<br/>         Banno, Haruhiko; Kyoto University Center for iPS Cell Research and Application; Kyoto University Hospital, Institute for Advancement of Clinical and Translational Science<br/>         Okunomiya, Taro; Kyoto University Hospital, Institute for Advancement of Clinical and Translational Science; Kyoto University Center for iPS Cell Research and Application,<br/>         Amino, Yoko; Kyoto University Hospital, Institute for Advancement of Clinical and Translational Science<br/>         Endo, Kayoko; Kyoto University Hospital, Institute for Advancement of Clinical and Translational Science<br/>         Nakakura, Akiyoshi; Kyoto University Hospital, Institute for Advancement of Clinical and Translational Science<br/>         Uozumi, Ryuji; Kyoto University Graduate School of Medicine Faculty of Medicine, Department of Biomedical Statistics and Bioinformatics<br/>         Kinoshita, Akemi; Kyoto University Hospital, Institute for Advancement of Clinical and Translational Science<br/>         Tada, Harue; Kyoto University Hospital, Institute for Advancement of Clinical and Translational Science<br/>         Morita, Satoshi; Kyoto University Graduate School of Medicine Faculty of Medicine, Department of Biomedical Statistics and Bioinformatics<br/>         Ishikawa, Hidehiro; Mie University Graduate School of Medicine Faculty of Medicine, Neurology<br/>         Shindo, Akihiro; Mie University Graduate School of Medicine Faculty of Medicine, Neurology<br/>         Yasuda, Ken; Kyoto University Graduate School of Medicine Faculty of Medicine, Department of Neurology<br/>         Taruno, Yosuke; Kyoto University Graduate School of Medicine Faculty of Medicine, Department of Neurology<br/>         Maki, Takakuni; Kyoto University Graduate School of Medicine Faculty of Medicine, Department of Neurology<br/>         Suehiro, Takashi; Osaka University Graduate School of Medicine Department of Psychiatry<br/>         Mori, Kohji; Osaka University Graduate School of Medicine Department of</p> |

|           |                                                                                                                                                                                                                                                                                                                                                                                                                                                                                                                                                                                                                                                                                                                                                                                                                                                                                                                                                                                                                                                                                                                                                                                                                          |
|-----------|--------------------------------------------------------------------------------------------------------------------------------------------------------------------------------------------------------------------------------------------------------------------------------------------------------------------------------------------------------------------------------------------------------------------------------------------------------------------------------------------------------------------------------------------------------------------------------------------------------------------------------------------------------------------------------------------------------------------------------------------------------------------------------------------------------------------------------------------------------------------------------------------------------------------------------------------------------------------------------------------------------------------------------------------------------------------------------------------------------------------------------------------------------------------------------------------------------------------------|
|           | <p>Psychiatry<br/>Ikeda, Manabu; Osaka University Graduate School of Medicine<br/>Department of Psychiatry<br/>Fujita, Koji; Tokushima University Hospital, Neurology<br/>Izumi, Yuishin; Tokushima University Hospital, Neurology<br/>Kanemaru, Kazutomi; Tokyo Metropolitan Geriatric Hospital<br/>Ishii, Kenji; Tokyo Metropolitan Institute of Gerontology<br/>Shigenobu, Kazue; Koeki Zaidan Hojin Asakayama Byoin<br/>Kutoku, Yumiko; Kawasaki Medical School, Neurology<br/>Sunada, Yoshihide; Kawasaki Medical School, Neurology<br/>Kawakatsu, Shinobu; Fukushima Medical University Aizu Medical Center<br/>Shiota, Shunji; Time Therapeutics, Inc., Corporate Planning<br/>Watanabe, Toshifumi; Time Therapeutics, Inc.<br/>Uchikawa, Osamu; Towa Pharmaceutical Co Ltd<br/>Takahashi, Ryosuke; Kyoto University Graduate School of Medicine<br/>Faculty of Medicine, Department of Neurology;<br/>Tomimoto, Hidekazu; Mie University Graduate School of Medicine<br/>Faculty of Medicine, Department of Neurology<br/>Inoue, Haruhisa; Kyoto University Center for iPS Cell Research and<br/>Application; Kyoto University Hospital, Institute for Advancement of<br/>Clinical and Translational Science</p> |
| Keywords: | <p>Dementia &lt; NEUROLOGY, Clinical trials &lt; THERAPEUTICS, Neurogenetics<br/>&lt; NEUROLOGY, Neurology &lt; INTERNAL MEDICINE, Neurobiology &lt;<br/>NATURAL SCIENCE DISCIPLINES</p>                                                                                                                                                                                                                                                                                                                                                                                                                                                                                                                                                                                                                                                                                                                                                                                                                                                                                                                                                                                                                                 |
|           |                                                                                                                                                                                                                                                                                                                                                                                                                                                                                                                                                                                                                                                                                                                                                                                                                                                                                                                                                                                                                                                                                                                                                                                                                          |

SCHOLARONE™  
Manuscripts

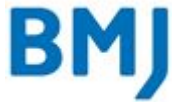

I, the Submitting Author has the right to grant and does grant on behalf of all authors of the Work (as defined in the below author licence), an exclusive licence and/or a non-exclusive licence for contributions from authors who are: i) UK Crown employees; ii) where BMJ has agreed a CC-BY licence shall apply, and/or iii) in accordance with the terms applicable for US Federal Government officers or employees acting as part of their official duties; on a worldwide, perpetual, irrevocable, royalty-free basis to BMJ Publishing Group Ltd ("BMJ") its licensees and where the relevant Journal is co-owned by BMJ to the co-owners of the Journal, to publish the Work in this journal and any other BMJ products and to exploit all rights, as set out in our [licence](#).

The Submitting Author accepts and understands that any supply made under these terms is made by BMJ to the Submitting Author unless you are acting as an employee on behalf of your employer or a postgraduate student of an affiliated institution which is paying any applicable article publishing charge ("APC") for Open Access articles. Where the Submitting Author wishes to make the Work available on an Open Access basis (and intends to pay the relevant APC), the terms of reuse of such Open Access shall be governed by a Creative Commons licence – details of these licences and which [Creative Commons](#) licence will apply to this Work are set out in our licence referred to above.

Other than as permitted in any relevant BMJ Author's Self Archiving Policies, I confirm this Work has not been accepted for publication elsewhere, is not being considered for publication elsewhere and does not duplicate material already published. I confirm all authors consent to publication of this Work and authorise the granting of this licence.

## Title

Repurposing bromocriptine for A $\beta$  metabolism in Alzheimer's disease (REBRAnD) study: Randomised Placebo-Controlled Double-Blind Comparative Trial and Open-Label Extension Trial to Investigate the Safety and Efficacy of Bromocriptine in Alzheimer's Disease with Presenilin 1 (PSEN1) Mutations

## Authors

Takayuki Kondo<sup>1,†</sup>, Haruhiko Banno<sup>1,2,†</sup>, Taro Okunomiya<sup>1,2</sup>, Yoko Amino<sup>2</sup>, Kayoko Endo<sup>2</sup>, Akiyoshi Nakakura<sup>2</sup>, Ryuji Uozumi<sup>2</sup>, Akemi Kinoshita<sup>2</sup>, Harue Tada<sup>2</sup>, Satoshi Morita<sup>2</sup>, Hidehiro Ishikawa<sup>3</sup>, Akihiro Shindo<sup>3</sup>, Ken Yasuda<sup>4</sup>, Yosuke Taruno<sup>4</sup>, Takakuni Maki<sup>4</sup>, Takashi Suehiro<sup>5</sup>, Kohji Mori<sup>5</sup>, Manabu Ikeda<sup>5</sup>, Koji Fujita<sup>6</sup>, Yuishin Izumi<sup>6</sup>, Kazutomi Kanemaru<sup>7</sup>, Kenji Ishii<sup>8</sup>, Kazue Shigenobu<sup>9</sup>, Yumiko Kutoku<sup>10</sup>, Yoshihide Sunada<sup>10</sup>, Shinobu Kawakatsu<sup>11</sup>, Shunji Shiota<sup>12</sup>, Toshifumi Watanabe<sup>12</sup>, Osamu Uchikawa<sup>13</sup>, Ryosuke Takahashi<sup>4</sup>, Hidekazu Tomimoto<sup>3,‡</sup>, Haruhisa Inoue<sup>1,2,‡</sup>

## Author affiliations

1. CiRA Center for iPS Cell Research and Application (CiRA), Kyoto University, Kyoto, Japan
2. iACT Institute for Advancement of Clinical and Translational Science (iACT), Kyoto University Hospital, Kyoto, Japan
3. Department of Neurology, Mie University Graduate School of Medicine, Tsu, Japan.
4. Department of Neurology, Graduate School of Medicine, Kyoto University, Kyoto, Japan
5. Department of Psychiatry, Osaka University Graduate School of Medicine, Suita, Japan
6. Department of Neurology, Tokushima University Graduate School of Biomedical Sciences, Tokushima, Japan
7. Department of Stroke, Tokyo Metropolitan Geriatric Medical Center, Tokyo, Japan
8. Research Team for Neuroimaging, Tokyo Metropolitan Institute of Gerontology, Tokyo, Japan
9. Department of Neuropsychiatry, Asakayama Hospital, Sakai, Japan
10. Department of Neurology, Kawasaki Medical School, Kurashiki, Japan
11. Department of Neuropsychiatry, Aizu Medical Center, Fukushima Medical University, Fukushima, Japan
12. Time Therapeutics, Inc., Kyoto, Japan
13. Towa Pharmaceutical Co., Ltd., Kadoma, Japan

† : equal contribution, ‡ : equal contribution for correspondence

**Contact information**

Haruhisa Inoue

haruhisa@cira.kyoto-u.ac.jp

CiRA Center for iPS Cell Research and Application (CiRA), Kyoto University, Kyoto, Japan

Hidekazu Tomimoto

tomimoto@clin.medic.mie-u.ac.jp

Department of Neurology, Mie University Graduate School of Medicine, Tsu, Japan

**Key words**

Alzheimer disease, clinical trial, presenilin-1, induced pluripotent stem cells, bromocriptine

3844 words

## ABSTRACT

### Introduction

Alzheimer's disease (AD) is one of the most common causes of dementia. Pathogenic variants in the PSEN1 gene are the most frequent cause of early-onset AD. Medications for patients with AD bearing PSEN1 mutation (PSEN1-AD) are limited to symptomatic therapies and no established radical treatments are available. Induced pluripotent stem cell (iPSC)-based drug repurposing identified bromocriptine as a therapeutic candidate for PSEN1-AD. In this study, we used an enrichment strategy with iPSCs to select the study population, and we will investigate the safety and efficacy of an orally administered dose of bromocriptine in patients with PSEN1-AD.

### Methods and analysis

This is a multi-centre, randomised, placebo-controlled trial. AD patients with PSEN1 mutations and a Mini Mental State Examination-Japanese (MMSE-J) score of  $\leq 25$  will be randomly assigned, at a 2 : 1 ratio, to the trial drug or placebo group ( $\geq 4$  patients in TW-012R and  $\geq 2$  patients in placebo). This clinical trial consists of a screening period, double-blind phase (9 months), and extension phase (3 months). The double-blind phase for evaluating the efficacy and safety is composed of the low-dose maintenance period (10 mg/day), high-dose maintenance period (22.5 mg/day), and tapering period of the trial drug. Additionally, there is an open-labelled active drug extension period for evaluating long-term safety. Primary outcomes are safety and efficacy in cognitive and psychological function. Also, exploratory investigations for the efficacy of bromocriptine by neurological scores and biomarkers will be conducted.

### Ethics and dissemination

The proposed trial is conducted according to the Declaration of Helsinki, and was approved by the Institutional Review Board (K070). The study results are expected to be disseminated at international or national conferences and published in international journals following the peer-review process.

### Trial registration number

jRCT2041200008 (Japan Registry of Clinical Trials), NCT 04413344 (ClinicalTrials.gov)

## ARTICLE SUMMARY

### Strengths and limitations of this study

- This trial will provide novel data regarding the safety and efficacy of bromocriptine for PSEN1-AD.
- The trial design includes enrichment of the patient population by iPSC technology.
- Various promising biomarkers will be investigated.
- A possible limitation may be a difficulty in recruiting a large-enough number of patients due to the rarity of PSEN1-AD.

For peer review only



## INTRODUCTION

Alzheimer's disease (AD) was first reported by Dr. Alois Alzheimer in 1906, and it is now regarded as the most prevalent neurodegenerative disease, accounting for 60–80% of dementia cases. Over 50 million people are estimated to live with dementia globally, a figure set to increase to 152 million by 2050 [1]. The number of AD patients is also expected to increase explosively in Japan in line with our super-aging society. Although this disease should be treated promptly, available treatments are limited to several symptomatic therapies [2].

AD is a neurodegenerative disease that presents clinical symptoms, primarily including progressive decline in memory. Elucidation of the central pathology of AD began in the 1980s with the identification of amyloid  $\beta$ -protein ( $A\beta$ ) by biochemical methods.  $A\beta$  is a major component of senile plaques, which represent a pathological characteristic of AD. Subsequently, in the 1990s, genetic approaches identified the  $A\beta$  precursor protein (APP), presenilin 1 (PSEN1), and presenilin 2 (PSEN2) as causative genes for familial AD, thereby rapidly advancing the understanding of such condition [3]. Notably, AD patients with mutations in the PSEN1 gene (PSEN1-AD) experience onset in their 20s to 50s, and their cognitive function deteriorates rapidly, leading to death within several years, as curative therapies are unavailable [4]. Thus, the development of new drugs for PSEN1-AD is eagerly awaited. Converging basic and clinical evidence suggests that mutant PSEN1 could affect the function of  $\gamma$ -secretases in neurons and increase the  $A\beta_{42}$  levels in plasma of FAD patients, transfected cells, and transgenic mice [5,6,7]. This abnormal production of  $A\beta$  was estimated to originate from the altered conformation of the  $\gamma$ -secretase complex and changes in the active site of the cleavage process [8,9].

To develop therapeutic compounds for PSEN1-AD, we previously established induced pluripotent stem cells (iPSCs) from patients with PSEN1-AD. iPSCs were established by introducing a small number of genes into patients' cells. Established iPSCs can differentiate into any type of cell in the body and proliferate indefinitely. iPSC technology provided *in vitro* models of inaccessible human cell types and impacted investigations of disease mechanisms especially in brain disorders. We established an iPSC-based screening system by modelling  $A\beta$  phenotypes of PSEN1-AD [10]. We utilised an existing drug library the safety and pharmacokinetic profile of which had already been confirmed clinically and approved for use in humans [10]. After the screening, we found bromocriptine to be the most potent modifier of  $A\beta$  production for PSEN1-AD neurons among existing drugs. Dose-dependency assay showed that bromocriptine reduced the  $A\beta_{42}$  dose and  $A\beta_{42}/40$  ratio by up to ~50% and ~40%, respectively. Furthermore, we prepared cortical neurons of several patients with PSEN1-AD and sporadic AD to evaluate the specificity of bromocriptine for PSEN1-AD. Bromocriptine

1  
2  
3  
4 reduced the A $\beta$ 42 dose and A $\beta$ 42/40 ratio of PSEN1-AD neurons more strongly than those of sporadic  
5 AD neurons. From these results, we selected patients with PSEN1-AD as a bromocriptine-responsive  
6 subgroup in AD [11,12].  
7

8  
9 Bromocriptine is an already approved drug with few safety concerns and a long history of usage  
10 in clinical settings. Bromocriptine was approved for the treatment of Parkinson's disease (approved  
11 dosage 22.5mg/day) [13], pituitary tumour, and hyperprolactinaemia, and was proven to penetrate the  
12 blood-brain barrier. Based on iPSC studies, as we hypothesised that bromocriptine might attenuate the  
13 clinical symptoms of PSEN1-AD patients, we decided to conduct a clinical trial to evaluate the safety  
14 and efficacy of the first-time administration to PSEN1-AD patients as an investigator-initiated clinical  
15 trial (exploratory study), which will confirm its safety and provide evidence of its efficacy.  
16  
17  
18  
19  
20  
21

## 22 **OBJECTIVES**

23  
24 The aim of this study is to investigate the safety and efficacy of an orally administered dose of  
25 bromocriptine in patients with PSEN1-AD using a placebo group as control. In addition, long-term  
26 safety will be examined in an open-label extension trial.  
27  
28  
29

## 30 **METHODS AND ANALYSIS**

### 31 **Trial population and rationale for selecting participants**

32  
33 The following patients will be included in this study. Detailed eligibility criteria are presented in “Box  
34 1”. This ongoing clinical trial started to enrol participants in June 2020.  
35  
36  
37  
38

- 39 ▶ Alzheimer's disease patients with PSEN1 mutations (PSEN1-AD)
- 40 ▶ Patients diagnosed with “probable AD” according to the diagnostic guideline of NIA-AA [14] or  
41 “probable Alzheimer-type dementia” according to the diagnostic criteria for Alzheimer's disease  
42 specified in DSM-5 [15]
- 43 ▶ Mini Mental State Examination-Japanese (MMSE-J) score of  $\leq 25$   
44  
45  
46  
47  
48  
49

50 PSEN1-AD is the target disease. The MMSE-J score will be specified at 25 points or lower to  
51 enrol patients with dementia and mild cognitive impairment and to exclude those with normal  
52 cognitive function. We will exclude MCI participants with MMSE-J scores of 26 or 27, who are  
53 reported to have lower risk and longer duration of MCI conversion to AD [16]. The concomitant use  
54 of existing drugs for the treatment of AD (donepezil, galantamine, rivastigmine, and memantine) will  
55  
56  
57  
58  
59  
60

1  
2  
3  
4 be allowed to evaluate the safety and efficacy of future practical bromocriptine use upon approval, but  
5 patients who have changed their regimen within 2 months before providing informed consent will be  
6 excluded because the efficacy of bromocriptine alone will be difficult to evaluate. Patients taking oral  
7 donepezil hydrochloride will be carefully monitored because the blood concentration may be increased  
8 by the additional oral administration of the trial drug. Recruiting will be done by neurologists who  
9 treat PSEN1-AD patients and are blinded to their allocation. All participants in the study need to be  
10 confirmed for the presence of PSEN-1 mutation by genetic analyses. Given that PSEN1-AD patients  
11 are very few, the planned feasible recruitment duration will be 10 months.  
12  
13  
14  
15  
16  
17  
18

### 19 **Sample size**

20  
21 The number of PSEN1-AD patients confirmed by genetic diagnosis in Japan is approximately  
22 100 according to the Japanese Familial Alzheimer's Disease (JFAD) database [17] and a report of a  
23 research project on the support system for individuals with familial AD and their families in Japan  
24 [18]. This number corresponds to the global data of reported cases from Asia, the UK and the US  
25 [19,20,21]. In addition, compared with patients with sporadic AD without PSEN1 mutations, PSEN1-  
26 AD patients have a more rapid progression of cognitive decline and a more substantial decrease in the  
27 ability to perform daily living activities (ADLs) owing to the overlap of various neurologic symptoms,  
28 including spastic paralysis and extrapyramidal symptoms. Hence, the number of patients is more  
29 limited to those who meet the inclusion criteria (Box 1) in the limited trial duration. Given such rarity,  
30 the patient accumulation is extremely low and the targeted sample size for this randomised trial is  $\geq 4$   
31 patients in TW-012R and  $\geq 2$  patients in placebo based on feasibility and the aforementioned validity.  
32 Unequal randomisation will be employed because of ethical considerations. There is no formal  
33 hypothesis or power sample size calculation due to the exploratory nature of this study. Thus, we did  
34 not perform sample size calculation. To ensure that sufficient participants complete the trial, clinical  
35 research coordinators will communicate well and frequently both with the central coordinating centre  
36 and the participants/care givers.  
37  
38  
39  
40  
41  
42  
43  
44  
45  
46  
47  
48  
49

### 50 **Intervention and control**

51 This clinical trial consists of the screening period (8 weeks), double-blind phase (37 weeks), and  
52 extension phase (13 weeks). The double-blind phase for evaluating the efficacy and safety is composed  
53 of the low-dose maintenance period (20 weeks), high-dose maintenance period (16 weeks), and  
54 tapering period of the trial drug (1 week). Additionally, there is an open-labelled active drug extension  
55  
56  
57  
58  
59  
60

1  
2  
3  
4 period for evaluating long-term safety (Figure 1). Participants who are screened during the screening  
5 period and assessed as eligible will be randomly assigned to the bromocriptine and placebo groups.

6  
7 ► Intervention – bromocriptine (TW-012R, each tablet contains 2.5 mg of bromocriptine, Towa  
8 Pharmaceutical) [13]

9  
10 ► Control – placebo (tablets identical in appearance, smell and taste)

11  
12 Participants will receive the trial drug in the double-blind phase, during which the low-dose  
13 maintenance period (from the start of trial treatment until Week 20) will be started with 1 tablet of  
14 TW-012R or placebo administered orally once daily. The daily dose will be increased by 1 tablet per  
15 week up to 4 tablets (10 mg) daily until Week 20 as the maintenance dose. The safety and efficacy of  
16 bromocriptine orally administered at 10 mg/day will be evaluated in comparison with the placebo.  
17 Then, the high-dose maintenance period (weeks 20–36) will be started with 5 tablets of TW-012R or  
18 placebo daily (further increased by 1 tablet from the maintenance dose of the low-dose maintenance  
19 period). The daily dose will be increased by 1 tablet per week, and a maximum of 9 tablets (22.5 mg)  
20 daily will be continued as the maintenance dose until Week 36. The safety and efficacy of  
21 bromocriptine orally administered at a dose of 22.5 mg/day will be evaluated in comparison with the  
22 placebo. During the tapering period of the trial drug (weeks 36–37), the dose of bromocriptine or  
23 placebo will be tapered to 1 tablet from the previous dose during 1 week.

24  
25 In the extension phase (weeks 37–50), the participants in both groups will start oral administration  
26 of 1 tablet of TW-012R (2.5 mg) once daily. The daily dose will be increased by 1 tablet per week,  
27 and the administration will be continued until Week 48 at a standard dose of 4 tablets daily, with a  
28 maximum of 9 tablets, as maintenance dose to evaluate the safety of the long-term administration of  
29 bromocriptine. Then, the dose will be tapered during about 1–2 weeks to complete the treatment.

30  
31 In all phases, “not increasing the dose” or “decreasing the dose” is allowed at the discretion of  
32 the investigator from the viewpoint of safety of the participants. Adherence will be monitored by  
33 counting empty PTP (press through pack) sheets of study drugs. Due to the COVID-19 pandemic in  
34 2020, we amended our protocol to make it possible to deliver study drugs if a participant cannot visit  
35 a medical facility. For participant retention and safety reasons, a participant will have 10 phone-call-  
36 visits in addition to monthly onsite-visits.

37  
38 As for drug interactions, CYP3A4 inhibitors/inducers and dopamine antagonists are prohibited  
39 because bromocriptine is primarily metabolised by CYP3A4 and drug interaction is anticipated.  
40 Benzodiazepines are also prohibited because they might result in reduced efficacy in the clinical  
41 phenotype, especially cognitive function.

1  
2  
3 This study will be conducted at 6 academic hospitals and 1 community hospital in Japan.

4 Standard Protocol Items: Recommendations for Interventional Trials (SPIRIT checklist) was  
5 followed in designing the study protocol.  
6  
7  
8  
9

### 10 **Randomisation, allocation, and blinding**

11 Patients meeting all the inclusion criteria and not meeting any of the exclusion criteria (Box 1) at  
12 the time of enrolment in the trial will be randomly assigned, at a 2 : 1 ratio, to receive either TW-012R  
13 or placebo. Owing to the ethical issue for patients assigned to the placebo group, unequal  
14 randomisation will be employed. Randomisation will be performed using permuted blocks and  
15 stratified based on the important confounding variable of the baseline MMSE-J score ( $< 13$  or  $\geq 13$ ).  
16 The allocation sequence will be prepared by an external contract research organization, and trial  
17 participants, care givers, outcome assessors and investigators will be blinded. Registration will be done  
18 by investigators etc. using the web enrolment system. When a patient is determined to be eligible by  
19 the web enrolment system, the allocated drug number will be displayed as the enrolment result. Under  
20 emergency circumstances such as severe adverse events, unblinding is permissible by the discretion of  
21 the coordinating investigators.  
22  
23  
24  
25  
26  
27  
28  
29  
30  
31

### 32 **Outcomes**

#### 33 Primary endpoint 1) safety

34 As the primary analysis, safety will be evaluated by collecting incidence information and severity of  
35 adverse events (AEs) or adverse reactions from the starting time of the administration of the trial drug  
36 to the end of the follow-up period (Table 1). Known frequent adverse effects of bromocriptine include  
37 nausea and vomiting (8.3%), anorexia (2.5%), and gastric discomfort, based on 5212 cases with  
38 Parkinson's syndrome [22].  
39  
40  
41  
42  
43  
44  
45  
46

#### 47 Primary endpoint 2) Severe Impairment Battery-Japanese (SIB-J)

48 SIB-J is validated in the Japanese version and will be used to evaluate cognitive function [23,24,25].  
49 Higher scores indicate better cognitive function (range 0–100). Participants will be questioned and  
50 assessed by the investigator, sub-investigator, clinical psychologist or speech therapist. Individual time  
51 courses of observed values and changes from baseline in SIB-J score up to Week 20 and Week 36 after  
52 trial drug administration will be shown (Table 1).  
53  
54  
55  
56  
57  
58  
59  
60

### Primary endpoint 3) Neuropsychiatric Inventory (NPI)

NPI (Japanese version) is a validated clinical instrument for evaluating psychopathology in dementia [26,27,28]. Higher scores indicate more severe neuropsychiatric derangements (range 10–120). Caregivers will be interviewed and assessed by the investigator, sub-investigator, clinical psychologist or speech therapist. Individual time courses of observed values and changes from baseline in NPI score up to Weeks 20 and 36 after trial drug administration will be shown (Table 1).

### Secondary endpoints

Changes in the following 1) to 11) will be shown individually. For the blood bromocriptine concentration on Day 1, key pharmacokinetic parameters (C<sub>max</sub>, T<sub>max</sub>) will be calculated (Table 1).

- 1) Mental Function Impairment Scale (MENFIS) [29]
- 2) MMSE-J [30,31,32]
- 3) Disability Assessment for Dementia (DAD) [33]
- 4) Movement Disorder Society-sponsored revision of the Unified Parkinson's Disease Rating Scale (MDS-UPDRS) Part III [34]
- 5) Apathy Evaluation Scale Informant Version [35,36]
- 6) Plasma A $\beta$  protein [37]
- 7) Plasma neurofilament light chain protein (NfL) [38]
- 8) Plasma total tau and plasma phosphorylated tau protein [37,39,40,41]
- 9) Cerebrospinal fluid A $\beta$  (CSF A $\beta$ ) [42,43]
- 10) Cerebrospinal fluid total tau and phosphorylated tau protein (CSF total/p-tau) [42,43]
- 11) Blood bromocriptine concentration

### Reference endpoints

For exploratory purposes, additional measurement with wearable physical activity meter (Silmee™W20, TDK Corporation, Tokyo, Japan), measurement with finger tapping device (UB-2, Maxell, Ltd. Tokyo, Japan), brain amyloid PET [44], brain tau PET [45], Upper Motor Neuron Burden Score (UMNB) [46], and plasma A $\beta$ -related peptides [47] will be assessed as reference endpoints (Table 1). The wearable physical activity meter continuously monitors activity, sleep habits, amount of speech, time of physical movement, and heart rate variability. Finger tapping is correlated with

1  
2  
3 cognitive function and parkinsonian signs, and it allows obtaining parameters directly related to ADLs  
4 not limited to cognitive function evaluated by questionnaires.  
5  
6  
7

8  
9 All neuropsychological testing will be conducted by certified physicians or psychologists who  
10 completed the assessment training of this trial. Learning effect cannot be negligible, but this trial has  
11 a placebo arm, and previous trials using SIB-J, NPI, MENFIS and DAD adopted similar measuring  
12 time frames and no obvious learning effects were reported [48,49].  
13  
14  
15

### 16 17 **Data management, monitoring, and auditing**

18  
19 The Data Centre will manage the data using the participant identification code or enrolment  
20 number. In direct access to source data related to the conduct of this trial, the participants' informed  
21 consent forms, and publication of the trial results, full consideration should be given to the protection  
22 of privacy and personal information, such as the participants' names and diseases. The full dataset  
23 without personal identifiable information will be accessed by data managers, statisticians and  
24 investigators. An independent data monitoring committee has been established to assess the safety data.  
25  
26  
27

28  
29 Trial auditing will be conducted multiple times by an outside contract research organization.  
30 Biological specimens will be preserved for future use in ancillary studies with the participants' consent.  
31  
32  
33

### 34 35 **Statistical analysis**

36  
37 Safety analyses will be performed for patients who undergo at least part of the trial treatment.  
38 Efficacy analyses will be performed among patients who undergo at least part of the trial treatment,  
39 provide efficacy information, and satisfy study inclusion criteria. Descriptive statistics will be used to  
40 analyse safety data; results will be summarised as counts and percentages. For efficacy endpoints,  
41 changes from baseline will be summarised and compared at weeks 20 and 36 using descriptive  
42 statistics including mean differences with 95% confidence intervals and *p* values derived from  
43 Student's *t* test with the assumption of normality. If the assumption is violated, nonparametric tests  
44 will be considered. No imputation will be performed for missing data. Owing to the exploratory nature  
45 of this study, no adjustments will be made for multiple testing. To support the robustness of the results,  
46 a sensitivity analysis with and without non-compliant patients will be conducted. A subgroup analysis  
47 in accordance with the baseline MMSE-J score ( $< 13$  or  $\geq 13$ ) will be performed to investigate the  
48 patient response to bromocriptine. All statistical analyses will be performed using SAS software,  
49  
50  
51  
52  
53  
54  
55  
56  
57  
58  
59  
60

1  
2  
3 version 9.4 or higher (SAS Institute, Cary, NC). The statistical analysis plan will be developed prior  
4 to database lock.  
5  
6  
7

### 8 **Patient and public involvement**

9  
10 No patient or public were involved in this study design. However, in the design of this study,  
11 patients and their family burdens were assessed with the help of neurologists and clinical trial  
12 coordinators of Kyoto University Hospital.  
13  
14  
15  
16  
17

### 18 **ETHICS AND DISSEMINATION**

19  
20 This trial will be conducted in compliance with the ethical principles that have their origin in the  
21 Declaration of Helsinki (1964) and its revisions, namely, “Act on Securing Quality, Efficacy and  
22 Safety of Products including Pharmaceuticals and Medical Devices,” “Ministerial Ordinance on Good  
23 Clinical Practice for Drugs,” and its related notifications, written procedures, and this protocol. This  
24 trial was approved by the Institutional Review Board (K070, Kyoto University Hospital; F-2020-016,  
25 Mie University Hospital; 209001-A, Osaka University Hospital; 2105 (02-5), Tokushima University  
26 Hospital; T19-04 Tokyo Metropolitan Geriatric Hospital; 20200421, Kawasaki Medical School  
27 Hospital; 20200624, Asakayama Hospital).  
28  
29  
30  
31  
32  
33

34 The investigator will prepare the written information for participants and the informed consent  
35 form and will obtain approval from the Institutional Review Board in advance. Items to be described  
36 in the written information shall be prepared based on Article 51 of the “Ministerial Ordinance on Good  
37 Clinical Practice for Drugs”. If the investigator, etc. obtains any information that may affect the  
38 intention of the participant or the participant’s legally acceptable representative to continue to  
39 participate in the trial, he/she will promptly provide the information to the participant or the  
40 participant’s legally acceptable representative to confirm the intention of whether to continue to  
41 participate in the trial. The investigator will also promptly revise the written information, submit it to  
42 the head of the trial site, and obtain approval from the Institutional Review Board. The investigator  
43 will provide another explanation to the participant who has already been participating in the trial or  
44 his/her legally acceptable representative using the revised written information, confirm the  
45 participant’s will as to whether or not to continue participation in the trial, and obtain written consent  
46 from the participant. If an adverse event occurs due to the conduct of the trial, leading to health injury  
47 in participants, the investigator will immediately provide the participant with appropriate diagnosis,  
48 treatment, and necessary measures including compensation insurance.  
49  
50  
51  
52  
53  
54  
55  
56  
57  
58  
59  
60



1  
2  
3  
4 Persons involved in this trial shall comply with applicable laws and ordinances, shall exert their  
5 utmost efforts to protect personal information and privacy of the participants, and shall not leak  
6 personal information obtained in the conduct of the trial without justifiable reasons. The same shall  
7 apply after their retirement. When submitting the patient enrolment forms and case report forms, the  
8 investigator, sub-investigator, and clinical trial collaborator will use the participant identification code  
9 and will not enter information that allows persons outside the trial site to identify the participant (e.g.,  
10 name, address, and telephone number). The central trial office, data centre and statisticians will use  
11 only the participant identification codes and cannot access the participants' personal information.  
12  
13  
14  
15  
16

17 The proposed study will evaluate both the safety and efficacy of bromocriptine in PSEN1-AD,  
18 and the study results are expected to be disseminated at international and/or national conferences and  
19 published in international journals following the peer-review process.  
20  
21  
22  
23

## 24 **DISCUSSION**

25  
26 This study evaluates the safety and explores the efficacy of bromocriptine for patients with  
27 PSEN1-AD. The potential efficacy of bromocriptine for PSEN1-AD patients has already been  
28 identified by an approach applying iPSC-based drug repurposing [10]. We previously developed a  
29 phenotypic screening system to evaluate compounds with a readout of A $\beta$ 42 reduction using familial  
30 and sporadic AD patient-iPSCs. Our high-throughput screening system revealed that bromocriptine,  
31 among 1,258 pharmaceutical compounds, reduced the A $\beta$ 42 level most effectively. This drug reduced  
32 A $\beta$ 42 by 50% in PSEN1-AD iPSCs, and by 20-30% in sporadic patient-iPSC models [10]. A recent  
33 report implies that inhibition of less than 50 percent of A $\beta$  might preserve neuronal signalling because  
34 the APP family plays an important role in synaptic plasticity underlying learning and memory [50].  
35 Thus, we designed the clinical trial for PSEN1-AD with the expectation that bromocriptine will  
36 become a candidate as a molecularly targeted drug for AD, and especially for PSEN1-AD.  
37  
38  
39  
40  
41  
42  
43

44 Bromocriptine is a therapeutic agent used for the treatment of patients with Parkinson's disease,  
45 and the accumulated data of long usage verifies its safety for patients with Parkinson's disease.  
46 However, evaluation of the safety of bromocriptine in AD patients is required in order to support its  
47 development for the treatment of AD. This clinical trial consists of a 20-week low-dose maintenance  
48 period followed by a 16-week high-dose maintenance period to assess its safety. For recruitment and  
49 ethical considerations, we also added a 13-week open extension period to continue to follow the safety  
50 of the trial drug.  
51  
52  
53  
54  
55  
56  
57  
58  
59  
60

1  
2  
3  
4 Safety information has been accumulated from long usage of bromocriptine since the 1970s.  
5 While nausea and vomiting are the most commonly reported adverse events, it is generally manageable  
6 by slow titration of the medication and use of antiemetics. While the occurrence and management of  
7 adverse events in AD patients seem to be comparable to those with Parkinson's disease, this study was  
8 designed to evaluate any unacceptable adverse events that specifically occur in PSEN1-AD patients.  
9 During the recruiting period of this study, the COVID-19 pandemic is influencing study recruitment,  
10 onsite monitoring, and participants' visit schedules all over the world. Our study protocol enabled the  
11 delivery of the study drugs. Further, remote informed consent and cognitive/neuropsychiatric  
12 evaluation by tablet or digital devices can be used in future trials for AD to reduce the study burden  
13 for participants and their caregivers [51].

14  
15  
16  
17  
18  
19  
20  
21 In this study we will limit the included patients to those with PSEN1-AD, because bromocriptine  
22 is most effective in PSEN1-AD patient-derived iPSCs compared to other types of familial AD and  
23 sporadic AD patients' iPSCs [11,12]. This enrichment will make it difficult to recruit many patients  
24 for this study, considering the rarity of such patients in Japan. Although the variety of clinical severities  
25 among patients is one of the reasons that cause difficulty for clinical trial evaluation, our inclusion  
26 criteria admit a broad disease-stage as we consider that PSEN1-AD patients would be the best  
27 candidates for bromocriptine administration. To explore the efficacy of the trial drug, various  
28 promising biomarkers in AD, plasma A $\beta$ , plasma A $\beta$ -related peptide, plasma NfL, plasma total/p-tau,  
29 CSF A $\beta$ , CSF total/p-tau, amyloid/tau PET, and digital biomarkers will be evaluated in this study.  
30 These biomarkers might indicate the target engagement, and its alteration might reflect the effect of  
31 bromocriptine treatment. Of note, digital biomarkers will potentially reduce participants' and  
32 caregivers' burden in future trials. Strengths of our study include participant enrichment using iPSC  
33 technology and exploratory biomarker investigation. A possible limitation of this study may be the  
34 difficulty in recruiting large numbers of patients due to the rarity of PSEN1-AD.

35  
36  
37  
38  
39  
40  
41  
42  
43  
44  
45 This study is the first to use bromocriptine for PSEN1-AD patients, and it presents both a low-  
46 and a high-dose safety verification as well as cognitive, neuropsychiatric and biomarker-based efficacy  
47 detections. This is a phase I/IIa study for the safety and early efficacy evaluation with a small number  
48 of participants. Therefore, a large-scale study will be needed in the following phases. This study may  
49 pave the way for a new and practical disease-modifying AD therapy.  
50  
51  
52  
53  
54  
55  
56

## 57 **Author contributions**

58  
59  
60

1  
2  
3 TK, HB, TO, YA, KE, AN, RU, AK, H Tada, SM, SS, TW, and H Inoue conceived and designed the  
4 study. AN and RU will conduct the statistical analysis. H Ishikawa, AS, TM, KY, YT, KM, TS, MI,  
5  
6 KF, YI, KK, KI, KS, YK, YS, SK, OU, RT and H Tomimoto provided critical advice on the study  
7  
8 design. All authors critically revised the draft and approved the final version of this manuscript.  
9  
10

## 11 **Acknowledgements**

12 We would like to acknowledge and thank the members of the institute and hospitals in this study.  
13  
14 Patients and their family burdens were assessed with the help of neurologists and clinical trial  
15 coordinators of Kyoto University Hospital. We appreciate Tetsujiro Ihara at London Iryo Centre, and  
16  
17 Arthur Valentine and Randy Trask of Pearson Clinical Assessments (San Antonio, Texas) for  
18  
19 providing access to the Severe Impairment Battery (SIB), which provided valuable measurement  
20  
21 regarding the effectiveness of this protocol. We would like to express our sincere gratitude to all our  
22  
23 co-workers and collaborators, to Atsushi Onodera and Yuji Arakawa for PMDA negotiation, and to  
24  
25 Noriko Ito, Mikie Iijima, and Nozomi Kawabata for their administrative support.  
26  
27  
28

## 29 **Funding**

30  
31 This trial will be conducted with funding from Time Therapeutics, Inc. (award/grant number is not  
32  
33 applicable) and a grant from the invited project at iACT, Kyoto University Hospital (0709992110).  
34  
35 The trial drugs will be provided by Towa Pharmaceutical Co., Ltd.  
36  
37

## 38 **Competing interests**

39  
40 TK has a patent, Agent for preventing and/or treating Alzheimer's disease, licensed to H Inoue and  
41  
42 TK.; HB reports funding for this clinical trial from Time Therapeutics, Inc., trial drugs from Towa  
43  
44 Pharmaceutical Co., Ltd., during the conduct of the study; personal fees from Sumitomo Dainippon  
45  
46 Pharma Co., Ltd., outside the submitted work; RU reports personal fees from Eisai, Sawai  
47  
48 Pharmaceutical Co., Ltd., and CAC Croit, outside the submitted work; SM reports personal fees from  
49  
50 AstraZeneca K.K., Bristol-Myers Squibb Company, Chugai Pharmaceutical Co. Ltd., Eli Lilly Japan  
51  
52 K.K., MSD K.K., Nippon Boehringer Ingelheim Co. Ltd., Ono Pharmaceutical Co. Ltd., Pfizer Japan  
53  
54 Inc., and Taiho Pharmaceutical Co. Ltd.; YT reports personal fees from Sumitomo Dainippon Pharma  
55  
56 Co., Ltd., Otsuka Pharmaceutical Co., Ltd., AbbVie GK, Kyowa Kirin Co., Ltd., Takeda  
57  
58 Pharmaceutical Company Limited, Tsumura & Co., Eisai Co., Ltd., Sanofi K.K., Mylan EPD G.K.,  
59  
60 and Ono Pharmaceutical Co., Ltd., outside the submitted work; TM reports personal fees from Bayer

1  
2  
3  
4 Yakuhi, Ltd., and Otsuka Pharmaceutical Co., Ltd., outside the submitted work; MI reports grants  
5 and personal fees from Eisai Co., Ltd., Sumitomo Dainippon Pharma Co., Ltd., Otsuka Pharmaceutical  
6 Co., Ltd., MSD K.K., Daiichi Sankyo Co., Ltd., and Takeda Pharmaceutical Company Limited, grants  
7 from Mitsubishi Tanabe Pharma Corporation, personal fees from Janssen Pharmaceutical K.K., Nihon  
8 Medi-Physics Co., Ltd., Fujifilm, Novartis Japan, Meiji Seika Pharma Co., Ltd., Nippon Chemiphar  
9 Co., Ltd., Eli Lilly Japan K.K., and Chugai Pharmaceutical Co., Ltd., outside the submitted work; KF  
10 reports grants from Novartis, outside the submitted work; YI reports grants from Sumitomo Dainippon  
11 Pharma Co., Ltd., Eisai Co., Ltd., Japan Blood Products Organization, Otsuka Pharmaceutical Co.,  
12 Ltd., Kyowa Kirin Co., Ltd., Teijin Pharma Limited, Nihon Pharmaceutical Co., Ltd., and FP  
13 Pharmaceutical Corporation, outside the submitted work; KI reports grants, personal fees and other  
14 from GE Healthcare, during the conduct of the study; grants and personal fees from Nihon Medi-  
15 Physics Co. Ltd., and Eli Lilly Japan K.K., personal fees and other from Eisai Co., Ltd., and Chugai  
16 Pharmaceutical Co., other from Biogen, personal fees from Novartis, outside the submitted work; YK  
17 reports personal fees from Tsumura & Co., Novartis Japan, UCB Japan Co. Ltd., and Janssen  
18 Pharmaceutical K.K., outside the submitted work; YS reports grants from Nippon Shinyaku Co., Ltd.,  
19 and The Nakatomi Foundation, personal fees from FP Pharmaceutical Corporation, Sumitomo  
20 Dainippon Pharma Co., Ltd., and Novartis Japan, outside the submitted work; SK reports grants and  
21 personal fees from Eisai Co., Ltd., personal fees from Janssen Pharmaceutical K.K., Novartis Japan,  
22 Daiichi-Sankyo, Sumitomo Dainippon Pharma Co., Ltd., Fujifilm Toyama Chemical Co., Ltd., Nippon  
23 Chemiphar, Nihon Medi-Physics Co., Ltd., Tsumura & Co., and Eli Lilly Japan K.K., outside the  
24 submitted work; SS is an employee of Time Therapeutics, Inc.; TW is an employee of Time  
25 Therapeutics, Inc., during the conduct of the study; TW reports personal fees from KanonCure Inc.,  
26 Tsubota Laboratory, Inc., Dompé Farmaceutici S.p.A., and Novaliq GmbH, outside the submitted  
27 work; OU is an employee of Towa Pharmaceutical Co., Ltd.; RT reports grants and personal fees from  
28 Takeda Pharmaceutical Co., Ltd., Nippon Boehringer Ingelheim Co., Ltd., Sumitomo Dainippon  
29 Pharma Co., Ltd., Eisai Co., Ltd., Kyowa Kirin Co., Ltd., Otsuka Pharmaceutical Co., Ltd., and Sanofi  
30 K.K., grants from Astellas Pharma Inc., Novartis Japan, and Nihon Medi-Physics Co. Ltd., personal  
31 fees from AbbVie GK, Mitsubishi Tanabe Pharma Corporation, Mylan N.V., Japan Blood Products  
32 Organization, Sanwa Kagaku Kenkyusho Co., Ltd., FP Pharmaceutical Corporation, Tsumura & Co.,  
33 KAN Research Institute, Inc., Kissei Pharmaceutical Co., Ltd., Chugai Pharmaceutical Co., Ltd., and  
34 Biogen Inc., outside the submitted work; H Tomimoto reports personal fees from Daiichi Sankyo Co.,  
35 Ltd., outside the submitted work; H Inoue possesses reports grants and personal fees from Takeda  
36  
37  
38  
39  
40  
41  
42  
43  
44  
45  
46  
47  
48  
49  
50  
51  
52  
53  
54  
55  
56  
57  
58  
59  
60

1  
2  
3  
4 Pharmaceutical Co., Ltd., Eisai Co., Ltd., Suntory Wellness Limited, Institute for Health Care Science,  
5 and Mitsubishi Tanabe Pharma Corporation, grants from Taisho Pharmaceutical Co., Ltd., Toray  
6 Industries, Inc., KAN Research Institute, Inc., Shimadzu Corporation, MicroBiopharm Japan Co., Ltd.,  
7 Kaneka Corporation, Panasonic Corporation, Biogen Inc., and Stem Cell & Device Laboratory, Inc.  
8 (SCAD), personal fees from Nomura Securities Co., Ltd., FP Pharmaceutical Corporation, Nippon  
9 Chemiphar Co., Ltd., Kansai Pharmaceutical Industries Association, Otsuka Pharmaceutical Co., Ltd.,  
10 Kyowa Kirin Co., Ltd., outside the submitted work. H Inoue possesses unlisted stocks of Time  
11 Therapeutics, Inc. In addition, Kyoto University grants an exclusive license to Time Therapeutics, Inc.  
12 through iPS Academia Japan, Inc. regarding the invention of the trial drug (intellectual property) which  
13 was discovered through drug screening by the principal investigator (H Inoue). Thereby, Kyoto  
14 University and the principal investigator obtain a patent income from Time Therapeutics, Inc. H Inoue  
15 does not engage in data management, monitoring and statistical analyses. The coordinating  
16 investigators (H Tomimoto and HB) and Time Therapeutics, Inc. will conduct the trial under the  
17 investigator-initiated clinical trial agreement. Prior to the trial, the principal investigator and the  
18 coordinating investigators underwent a review and received approval by the Conflict of Interest  
19 Review Committee based on the conflict of interest management policy at each site. All remaining  
20 authors have declared no conflicts of interest.  
21  
22  
23  
24  
25  
26  
27  
28  
29  
30  
31  
32  
33

### 34 **Data statement**

35  
36 The study protocol, a model informed consent form, and the checklist based on the SPIRIT guidelines  
37 were attached as supplements.  
38  
39  
40  
41  
42  
43  
44  
45  
46  
47  
48  
49  
50  
51  
52  
53  
54  
55  
56  
57  
58  
59  
60

## Figure legends

### Figure 1. Design of REBRAnD study

The study consists of the screening period (8 weeks), double-blind phase (37 weeks), and extension phase (13 weeks). The double-blind phase for evaluating the efficacy and safety is composed of the low-dose maintenance period (up to 10 mg/day), high-dose maintenance period (up to 22.5 mg/day), and tapering period of the trial drug. Additionally, there is an open-labelled active drug extension period (up to 10 or 22.5 mg/day) for evaluating long-term safety.

For peer review only

Table 1. Trial schedule

| Timing                              |                                   | Screening period  |                                 | Double-blind phase         |                             |        |        |        |        |         |         |         |                             |         |         |         |         |         |         |         |
|-------------------------------------|-----------------------------------|-------------------|---------------------------------|----------------------------|-----------------------------|--------|--------|--------|--------|---------|---------|---------|-----------------------------|---------|---------|---------|---------|---------|---------|---------|
|                                     |                                   | Before enrollment | Before start of trial treatment | At start of administration | Escalation to 4 tablets/day |        |        |        |        |         |         |         | Escalation to 9 tablets/day |         |         |         |         |         | Taper   |         |
|                                     |                                   |                   |                                 |                            | Week 1                      | Week 2 | Week 3 | Week 4 | Week 8 | Week 12 | Week 16 | Week 20 | Week 21                     | Week 22 | Week 23 | Week 24 | Week 28 | Week 32 | Week 36 | Week 37 |
| Visit/medical examination           |                                   | ○                 | ○                               | ○                          | ○                           | Phone  | Phone  | ○      | ○      | ○       | ○       | ○       | ○                           | Phone   | Phone   | ○       | ○       | ○       | ○       | ○       |
| Informed consent                    |                                   | ○                 |                                 |                            |                             |        |        |        |        |         |         |         |                             |         |         |         |         |         |         |         |
| Neuropsychological/Motor assessment | ADAS-J cog                        | ○                 |                                 |                            |                             |        |        |        |        |         |         |         |                             |         |         |         |         |         |         |         |
|                                     | SIB-J                             |                   | ○                               | ○                          |                             |        |        |        |        |         |         | ○       |                             |         |         |         |         |         |         | ○       |
|                                     | NPI                               |                   | ○                               | ○                          |                             |        | ○      | ○      | ○      | ○       | ○       | ○       |                             |         |         | ○       | ○       | ○       | ○       |         |
|                                     | MENFIS                            |                   | ○                               | ○                          |                             |        | ○      | ○      | ○      | ○       | ○       | ○       |                             |         |         | ○       | ○       | ○       | ○       |         |
|                                     | MMSE-J                            | ○                 | ○                               | ○                          |                             |        |        |        |        |         |         | ○       |                             |         |         |         |         |         |         | ○       |
|                                     | DAD                               |                   | ○                               | ○                          |                             |        |        |        |        |         |         | ○       |                             |         |         |         |         |         |         | ○       |
|                                     | UPDRS part III                    |                   | ○                               | ○                          |                             |        |        |        |        |         |         | ○       |                             |         |         |         |         |         |         | ○       |
|                                     | Apathy Scale                      |                   | ○                               | ○                          |                             |        |        |        |        |         |         | ○       |                             |         |         |         |         |         |         | ○       |
|                                     | UMNB                              |                   | ○                               | ○                          |                             |        |        |        |        |         |         | ○       |                             |         |         |         |         |         |         | ○       |
| Laboratory biomarkers               | Plasma biomarkers                 |                   | ○                               | ○                          |                             |        |        |        |        | ○       |         | ○       |                             |         |         |         | ○       |         | ○       |         |
|                                     | CSF biomarkers                    |                   |                                 | ○                          |                             |        |        |        |        |         |         |         |                             |         |         |         |         |         | ○       |         |
| Digital biomarkers                  | Wearable physical activity        |                   | →                               | →                          | →                           | →      | →      | →      | →      | →       | →       | →       | →                           | →       | →       | →       | →       | →       | →       |         |
|                                     | Finger tapping                    |                   | ○                               | ○                          |                             |        | ○      | ○      | ○      | ○       | ○       | ○       |                             |         |         | ○       | ○       | ○       | ○       |         |
| PET                                 | Brain amyloid PET                 |                   | ○                               |                            |                             |        |        |        |        |         |         |         |                             |         |         |         |         |         | ○       |         |
|                                     | Brain tau PET                     |                   | ○                               |                            |                             |        |        |        |        |         |         |         |                             |         |         |         |         |         | ○       |         |
| Safety assessment                   | Cardiac ultrasound                | ○                 |                                 |                            |                             |        |        |        |        |         |         | ○       |                             |         |         |         |         |         |         | ○       |
|                                     | Chest X-ray                       | ○                 |                                 |                            |                             |        | ○      |        |        |         |         | ○       |                             |         |         | ○       |         |         |         | ○       |
|                                     | ECG                               | ○                 |                                 |                            | ▲                           |        | ○      | ▲      | ▲      | ▲       | ○       | ▲       |                             |         | ○       | ▲       | ▲       | ○       | ▲       |         |
|                                     | Head MRI                          | ○                 |                                 |                            |                             |        |        |        |        |         |         |         |                             |         |         |         |         |         | ○       |         |
|                                     | Blood bromocriptine concentration |                   |                                 | ○*                         |                             |        |        |        |        | ○       | ○       | ○       |                             |         |         |         | ○       | ○       | ○       |         |
|                                     | Laboratory tests                  | ○                 |                                 |                            |                             |        | ○      |        |        |         |         | ○       |                             |         |         | ○       |         |         | ○       |         |
| AEs                                 |                                   |                   | →                               | →                          | →                           | →      | →      | →      | →      | →       | →       | →       | →                           | →       | →       | →       | →       | →       | →       | →       |

|                                            |                                          | Extension phase                 |         |         |         |         |         |         |         |         |         |              |
|--------------------------------------------|------------------------------------------|---------------------------------|---------|---------|---------|---------|---------|---------|---------|---------|---------|--------------|
|                                            |                                          | Escalation to 4–9 tablets/day † |         |         |         |         |         |         |         |         |         | End of trial |
| Timing                                     |                                          | Week 37                         | Week 38 | Week 39 | Week 40 | Week 41 | Week 42 | Week 43 | Week 44 | Week 45 | Week 48 | Week 50      |
| <b>Visit/medical examination</b>           |                                          | ○                               | Phone   | Phone   | ○       | Phone   | Phone   | Phone   | ○       | Phone   | ○       | ○            |
| <b>Informed consent</b>                    |                                          |                                 |         |         |         |         |         |         |         |         |         |              |
| <b>Neuropsychological/motor assessment</b> | <b>ADAS-J cog</b>                        |                                 |         |         |         |         |         |         |         |         |         |              |
|                                            | <b>SIB-J</b>                             |                                 |         |         |         |         |         |         |         |         |         |              |
|                                            | <b>NPI</b>                               |                                 |         |         |         |         |         |         |         |         |         |              |
|                                            | <b>MENFIS</b>                            |                                 |         |         |         |         |         |         |         |         |         |              |
|                                            | <b>MMSE-J</b>                            |                                 |         |         |         |         |         |         |         |         |         |              |
|                                            | <b>DAD</b>                               |                                 |         |         |         |         |         |         |         |         |         |              |
|                                            | <b>UPDRS part III</b>                    |                                 |         |         |         |         |         |         |         |         |         |              |
|                                            | <b>Apathy Scale</b>                      |                                 |         |         |         |         |         |         |         |         |         |              |
| <b>Laboratory biomarkers</b>               | <b>Plasma biomarkers</b>                 |                                 |         |         |         |         |         |         |         |         |         |              |
|                                            | <b>CSF biomarkers</b>                    |                                 |         |         |         |         |         |         |         |         |         |              |
| <b>Digital biomarkers</b>                  | <b>Wearable physical activity</b>        |                                 |         |         |         |         |         |         |         |         |         |              |
|                                            | <b>Finger tapping</b>                    |                                 |         |         |         |         |         |         |         |         |         |              |
| <b>PET</b>                                 | <b>Brain amyloid PET</b>                 |                                 |         |         |         |         |         |         |         |         |         |              |
|                                            | <b>Brain tau PET</b>                     |                                 |         |         |         |         |         |         |         |         |         |              |
| <b>Safety assessment</b>                   | <b>Cardiac ultrasound</b>                |                                 |         |         |         |         |         |         |         |         |         | ○            |
|                                            | <b>Chest X-ray</b>                       |                                 |         |         |         |         |         |         |         |         |         | ○            |
|                                            | <b>ECG</b>                               | ▲                               |         |         | ▲       |         |         |         | ▲       |         | ▲       | ○            |
|                                            | <b>Head MRI</b>                          |                                 |         |         |         |         |         |         |         |         |         |              |
|                                            | <b>Blood bromocriptine concentration</b> |                                 |         |         |         |         |         |         |         |         |         |              |
|                                            | <b>Laboratory tests</b>                  |                                 |         |         | ○       |         |         |         |         |         |         | ○            |
| <b>AEs</b>                                 |                                          | →                               | →       | →       | →       | →       | →       | →       | →       | →       | →       | →            |



1  
2  
3  
4  
5  
6  
7  
8  
9  
10  
11  
12  
13  
14  
15  
16  
17  
18  
19  
20  
21  
22  
23  
24  
25  
26  
27  
28  
29  
30  
31  
32  
33  
34  
35  
36  
37  
38  
39  
40  
41  
42  
43  
44  
45  
46

○: To be performed

▲: To be performed if donepezil hydrochloride is co-administered.

• After the final visit of the last participant at Week 37, the blind will be broken following data lock to start analyses.

\*Schedule for measuring blood bromocriptine concentration on Day 1

| Time after first administration of trial drug (h) | Before administration | 1           | 2           | 3           | 4           | 6           |
|---------------------------------------------------|-----------------------|-------------|-------------|-------------|-------------|-------------|
| Time window (in principle)                        | -2 hours              | ± 5 minutes |
| Plasma bromocriptine                              | ○                     | ○           | ○           | ○           | ○           | ○           |

† Standard dose is 4 tablets/day, up to 9 tablets/day at maximum.

ADAS-J cog, Alzheimer's Disease Assessment Scale-cognitive subscale Japanese version; AEs, adverse events; DAD, Disability Assessment for Dementia; MENFIS, Mental Function Impairment Scale; MMSE-J, Mini Mental State Examination-Japanese; NPI, Neuropsychiatric Inventory; SIB-J, Severe Impairment Battery-Japanese; UMNb, Upper Motor Neuron Burden Score; UPDRS part III, Movement Disorder Society-sponsored revision of the Unified Parkinson's Disease Rating Scale Part III.

**Box 1****ELIGIBILITY CRITERIA**

Patients who meet all the following inclusion criteria and do not meet any of the exclusion criteria will be enrolled as eligible participants.

Inclusion criteria

- 1) Alzheimer's disease patients with PSEN1 mutations
- 2) Patients diagnosed with "probable AD" according to the diagnostic guideline of NIA-AA or "probable Alzheimer-type dementia" according to the diagnostic criteria for Alzheimer's disease specified in DSM-5
- 3) An MMSE-J score of  $\leq 25$
- 4) Patients whose cognitive function and every-day function are obviously impaired based on their medical record or information provided by a person well-acquainted with the patient
- 5) Patients for whom intellectual disability and mental disorders other than dementia can be ruled out based on their academic background, work history, and life history
- 6) Patients with a reliable and close relationship with a partner/caregiver
- 7) Age  $\geq 20$  years at the time of providing informed consent
- 8) Written informed consent has been obtained from the patient or his/her legally acceptable representative to participate in this trial

Exclusion criteria

- 1) Difficulty with the oral intake of tablets
- 2) Patients receiving anti-dementia drugs who have changed the dosing regimen during the 2 months prior to providing informed consent
- 3) Patients with dementia due to a pathology other than AD (e.g., vascular dementia, FTD, Lewy body dementia, progressive supranuclear palsy, corticobasal degeneration, Huntington's disease, prion disease)
- 4) Presence of clinically relevant or unstable mental disorders. Patients with major depression in remission can be enrolled
- 5) Imminent risk of self-harm or harm to others
- 6) Body mass index of  $\leq 17$  or  $\geq 35$
- 7) Patients with a history of alcohol dependence, drug dependence, or drug abuse within 5 years before providing informed consent
- 8) HBs antigen positive
- 9) Anti-HIV antibody positive
- 10) Anti-HTLV-1 antibody positive
- 11) Patients with an active infection such as hepatitis C and syphilis (STS/TPHA)
- 12) Patients with the following liver function values by testing before enrolment

- AST (GOT) > 4.0 × Upper limit of institutional reference range or
  - ALT (GPT) > 4.0 × Upper limit of institutional reference range
- 13) Patients with uncontrolled, clinically significant medical conditions (e.g., diabetes mellitus, hypertension, thyroid/endocrine disease, congestive cardiac failure, angina pectoris, cardiac/gastrointestinal disease, dialysis, and abnormal renal function with an estimated CLcr < 30 mL/min) within 3 months prior to providing informed consent in addition to the underlying disease to be investigated in the trial and for whom the investigator or sub-investigator considers that there is a significant medical risk in the patient's participation in the trial
  - 14) Patients with long QT syndrome or tendency toward prolonged QTc interval (male: ≥ 470 msec, female: ≥ 480 msec), or patients with a history/complication of torsades de pointes
  - 15) Patients with a history of malignancies within 5 years prior to providing informed consent  
However, patients with the following diseases can be enrolled if they are treated appropriately:
    - a. Skin cancer (basal cell, squamous cell)
    - b. Cervical carcinoma in situ
    - c. Localised prostate cancer
    - d. Malignancies that have not recurred for at least 3 years since surgery and the patient's physician has determined that the risk of recurrence is low
  - 16) Patients with clinically significant vitamin B1/B12 deficiency or folic acid deficiency within 6 months prior to providing informed consent
  - 17) Patients who participated in other clinical research/trials involving interventions within 3 months prior to providing informed consent
  - 18) Patients who previously received bromocriptine or TW-012R
  - 19) Patients with a history of hypersensitivity to bromocriptine or ergot alkaloids
  - 20) Patients with current or a history of thickened heart valve cusps, restricted heart valve motion, and associated heart valve lesions, such as stenosis, confirmed by echocardiography
  - 21) Pregnant females, lactating females, and females who may be pregnant (pregnancy test will be performed to confirm this status), and females who wish to become pregnant
  - 22) Other patients who are considered inappropriate for participating in this trial at the discretion of the investigator or sub-investigator

\* CYP3A4 inhibitors/inducers and dopamine antagonists are contraindicated during the trial period except for domperidone and quetiapine in emergent settings.

## References

- 1 Alzheimer's Disease International. 2019. World Alzheimer Report 2019: Attitudes to dementia. London: Alzheimer's Disease International.
- 2 Cummings J, Lee G, Ritter A, et al. Alzheimer's disease drug development pipeline: 2020. *Alzheimers Dement (N Y)* 2020;65:e12050.
- 3 Ryan NS, Nicholas JM, Weston PSJ, et al. Clinical phenotype and genetic associations in autosomal dominant familial Alzheimer's disease: a case series. *Lancet Neurol* 2016;15:1326–35.
- 4 Larner AJ, Doran M. Clinical phenotypic heterogeneity of Alzheimer's disease associated with mutations of the presenilin-1 gene. *J Neurol* 2006;253:139–58.
- 5 Duff K, Eckman C, Zehr C, et al. Increased amyloid-beta42(43) in brains of mice expressing mutant presenilin 1. *Nature* 1996;383:710–13.
- 6 Borchelt DR, Thinakaran G, Eckman CB, et al. Familial Alzheimer's disease-linked presenilin 1 variants elevate Abeta1-42/1-40 ratio in vitro and in vivo. *Neuron* 1996;17:1005–13.
- 7 Hardy J, Selkoe DJ. The amyloid hypothesis of Alzheimer's disease: progress and problems on the road to therapeutics. *Science* 2002;297:353–56.
- 8 Bentahir M, Nyabi O, Verhamme J, et al. Presenilin clinical mutations can affect gamma-secretase activity by different mechanisms. *J Neurochem* 2006;96:732–42.
- 9 Strooper BD, Iwatsubo T, Wolfe MS, et al. Presenilins and  $\gamma$ -secretase: structure, function, and role in Alzheimer Disease. *Cold Spring Harb Perspect Med* 2012;2:a006304.
- 10 Kondo T, Imamura K, Funayama M, et al. iPSC-Based Compound Screening and In Vitro Trials Identify a Synergistic Anti-amyloid  $\beta$  Combination for Alzheimer's Disease. *Cell Rep* 2017;21:2304–12.
- 11 WIPO PCT/JP2016/089217 <http://ips-cell.net/e/patent/docs/AJ139.pdf> (accessed on 25th July, 2020)
- 12 United States Patent Application Publication, INOUE et al. US20190008860A1 <https://patents.google.com/patent/US20190008860A1/en?q=KONDO+Inoue+Bromocriptine+alzheimer&oq=KONDO+Inoue+Bromocriptine+alzheimer> (accessed on 25th July, 2020)
- 13 Interview Form bromocriptine Tablets 2.5 mg "Towa," Towa Pharmaceutical Co., Ltd. <https://med.towayakuhin.co.jp/medical/product/product.php?id=T001706201703011557043R> (accessed on 24th July, 2020)
- 14 McKhann GM, Knopman DS, Chertkow H, et al. The diagnosis of dementia due to Alzheimer's disease: Recommendations from the National Institute on Aging-

- 1  
2  
3  
4 Alzheimer's Association workgroups on diagnostic guidelines for Alzheimer's disease.  
5 *Alzheimer's Dement* 2011;7:263–9.
- 6  
7 15 American Psychiatric Association. Diagnostic and Statistical Manual of Mental Disorders,  
8 Fifth Edition: DSM-5. Washington, DC: American Psychiatric Publishing 2013: 611–14.
- 9  
10 16 Tokuchi R, Hishikawa N, Kurata T, et al. Clinical and demographic predictors of mild  
11 cognitive impairment for converting to Alzheimer's disease and reverting to normal  
12 cognition. *J Neurol Sci* 2014;346:288-92.
- 13  
14 17 Japanese Familial Alzheimer's Disease (JFAD) database. <http://www.alzdb.org/jfad/>  
15 (accessed on 24<sup>th</sup> July, 2020)
- 16  
17 18 FY 2013 Subsidy for Geriatric Health Promotion, Project for Geriatric Health  
18 Enhancement: Report of Research Project on the Support System for Individuals With  
19 Familial Alzheimer's Disease and Their Families. 2013.
- 20  
21 19 Shea YF, Chu LW, Chan AO, et al. A systematic review of familial Alzheimer's disease:  
22 Differences in presentation of clinical features among three mutated genes and potential  
23 ethnic differences *J Formos Med Assoc* 2016;115:67–75.
- 24  
25 20 Ryan NS, Nicholas JM, Weston PSJ, et al. Clinical phenotype and genetic associations in  
26 autosomal dominant familial Alzheimer's disease: a case series. *Lancet Neurol*  
27 2016;15:1326–35.
- 28  
29 21 Tang M, Ryman DC, McDade E, et al. Neurological manifestations of autosomal  
30 dominant familial Alzheimer's disease: a comparison of the published literature with the  
31 Dominantly Inherited Alzheimer Network observational study (DIAN-OBS). *Lancet*  
32 *Neurol* 2016;15:1317–25
- 33  
34 22 Interview Form Parlodel Tablets 2.5 mg, Sun Pharma Japan Ltd. [https://medical.mt-](https://medical.mt-pharma.co.jp/di/file/dc/plo.pdf)  
35 [pharma.co.jp/di/file/dc/plo.pdf](https://medical.mt-pharma.co.jp/di/file/dc/plo.pdf) (accessed on 1st March, 2021)
- 36  
37 23 Saxton J, McGonigle-Gibson KL, Swihart AA, et al. Assessment of the severely impaired  
38 patient: Description and validation of a new neuropsychological test battery. *Psychol*  
39 *Assessment* 1990;2:298–303.
- 40  
41 24 Saxton J, McGonigle K, Swihart A, et al. Severe Impairment Battery (SIB). London, UK.  
42 Pearson Assessment 1993.
- 43  
44 25 Niina R, Homma A, Sugai Y, et al. Reliability, validity and clinical availability of a  
45 Japanese version of Severe Impairment Battery (SIB) and a Japanese version of modified  
46 Alzheimer's Disease Cooperative Study-Activities of Daily Living Inventory (ADCS-  
47 ADL). *Jpn J Geriatr Psychiatry* 2005;16:683–691.
- 48  
49 26 Cummings JL, Mega M, Gray K, et al. The Neuropsychiatric Inventory. Comprehensive  
50 assessment of psychopathology in dementia. *Neurology* 1994;44:2308–14.
- 51  
52 27 Cummings JL. The Neuropsychiatric Inventory. Assessing psychopathology in dementia  
53 patients. *Neurology* 1997;48:10S–16S.
- 54  
55  
56  
57  
58  
59  
60

- 1  
2  
3  
4 28 Hirono N, Mori E, Ikejiri Y, et al. Japanese version of the neuropsychiatric inventory a  
5 scoring system for neuropsychiatric disturbances in dementia patients. *No To Shinkei*  
6 1997;49:266–71.  
7  
8 29 Homma A, Niina R, Ishii T, et al. Development of a new rating scale for dementia in the  
9 elderly: Mental Function Impairment Scale (MENFIS) (in Japanese). *Jpn J Geriatr*  
10 *Psychiatry* 1991;2:1217–22.  
11  
12 30 Folstein MF, Folstein SE, McHugh PR. “Mini-mental state”: A practical method for  
13 grading the cognitive state of patients for the clinician. *J Psychiatr Res* 1975;12:189–98.  
14  
15 31 Sugishita M, Hemmi I, Takeuchi T. Reexamination of the Validity and Reliability of the  
16 Japanese Version of the Mini-Mental State Examination (MMSE-J). *Japanese Journal of*  
17 *Cognitive Neuroscience* 2016;18:168–83.  
18  
19 32 Sugishita M, Koshizuka Y, Sudou S, et al. The validity and reliability of the Japanese  
20 version of the Mini- Mental State Examination(MMSE-J) with the original procedure of  
21 the attention and calculation task(2001). *Japanese Journal of Cognitive Neuroscience*  
22 2018;20:91–110.  
23  
24 33 Galasko D, Bennett D, Sano M, et al. An inventory to assess activities of daily living for  
25 clinical trials in Alzheimer's disease. The Alzheimer's Disease Cooperative Study.  
26 *Alzheimer Dis Assoc Disord* 2002;11 Suppl 2:S33–39.  
27  
28 34 Goetz CG, Tilley BC, Shaftman SR, et al. Movement Disorder Society-sponsored revision  
29 of the Unified Parkinson's Disease Rating Scale (MDS-UPDRS): scale presentation and  
30 clinimetric testing results. *Mov Disord* 2007;23:2129–70.  
31  
32 35 Marin RS, Biedrzycki RC, Firinciogullari S. Reliability and validity of the apathy  
33 evaluation scale. *Psychiat Res* 1991;38:143–62.  
34  
35 36 Kasai M, Meguro K and Nakamura K. Reliability and validity of the Japanese version of  
36 the Apathy Evaluation Scale. *Nippon Ronen Igakkai Zasshi* 2014;51:445–52.  
37  
38 37 Palmqvist S, Janelidze S, Stomrud E, et al. Performance of Fully Automated Plasma  
39 Assays as Screening Tests for Alzheimer Disease–Related  $\beta$ -Amyloid Status. *JAMA*  
40 *Neurol* 2019;76:1060–69.  
41  
42 38 Schultz SA, Strain JF, Adedokun A, et al. Serum neurofilament light chain levels are  
43 associated with white matter integrity in autosomal dominant Alzheimer's disease.  
44 *Neurobiol Dis* 2020;142:104960.  
45  
46 39 Mielke MM, Hagen CE, Wennberg AMV, et al. Association of Plasma Total Tau Level  
47 With Cognitive Decline and Risk of Mild Cognitive Impairment or Dementia in the Mayo  
48 Clinic Study on Aging. *JAMA Neurol* 2017;74:1073–80.  
49  
50 40 Karikari TK, Pascoal TA, Ashton NJ, et al. Blood phosphorylated tau 181 as a biomarker  
51 for Alzheimer's disease: a diagnostic performance and prediction modelling study using  
52 data from four prospective cohorts. *Lancet Neurol* 2020;19:422–33.  
53  
54  
55  
56  
57  
58  
59  
60

- 1  
2  
3  
4 41 Tatebe H, Kasai T, Ohmichi T, et al. Quantification of plasma phosphorylated tau to use  
5 as a biomarker for brain Alzheimer pathology: pilot case-control studies including  
6 patients with Alzheimer's disease and down syndrome. *Mol Neurodegener* 2017;12:63.  
7  
8 42 Bateman RJ, Xiong C, Benzinger TLS, et al. Clinical and Biomarker Changes in  
9 Dominantly Inherited Alzheimer's Disease. *N Engl J Med* 2012;367:795–804.  
10  
11 43 Dubois B, Feldman HH, Jacova C, et al. Advancing research diagnostic criteria for  
12 Alzheimer's disease: the IWG-2 criteria. *Lancet Neurol* 2014;13:614–29.  
13  
14 44 Scheinin NM, Tolvanen TK, Wilson IA, et al. Biodistribution and radiation dosimetry of  
15 the amyloid imaging agent 11C-PIB in humans. *J Nucl Med* 2007;48:128–33.  
16  
17 45 Koole M, Lohith TG, Valentine JL, et al. Preclinical Safety Evaluation and Human  
18 Dosimetry of [18F]MK-6240, a Novel PET Tracer for Imaging Neurofibrillary Tangles.  
19 *Mol Imaging Biol* 2020;22:173–80.  
20  
21 46 Brettschneider J, Toledo JB, Van Deerlin VM, et al. Microglial Activation Correlates with  
22 Disease Progression and Upper Motor Neuron Clinical Symptoms in Amyotrophic Lateral  
23 Sclerosis. *PLoS One* 2012;7:e39216.  
24  
25 47 Nakamura A, Kaneko N, Villemagne VL, et al. High performance plasma amyloid- $\beta$   
26 biomarkers for Alzheimer's disease. *Nature* 2018;554:249–54.  
27  
28 48 Watanabe M, Nakamura Y, Yoshiyama Y, et al. Analyses of natural courses of Japanese  
29 patients with Alzheimer's disease using placebo data from placebo-controlled, randomized  
30 clinical trials: Japanese Study on the Estimation of Clinical course of Alzheimer's disease.  
31 *Alzheimers Dement (N Y)* 2019;5:398-408.  
32  
33 49 Noguchi-Shinohara M, Ono K, Hamaguchi T, et al. Safety and efficacy of Melissa  
34 officinalis extract containing rosmarinic acid in the prevention of Alzheimer's disease  
35 progression. *Sci Rep* 2020;10:18627.  
36  
37 50 Satir TM, Agholme L, Karlsson A, et al. Partial reduction of amyloid  $\beta$  production by  $\beta$ -  
38 secretase inhibitors does not decrease synaptic transmission. *Alzheimers Res Ther*  
39 2020;12:63.  
40  
41 51 Weinberg MS, Patrick RE, Schwab NA, et al. Clinical Trials and Tribulations in the  
42 COVID-19 Era. *Am J Geriatr Psychiatry* 2020;28:913–20.  
43  
44  
45  
46  
47  
48  
49  
50  
51  
52  
53  
54  
55  
56  
57  
58  
59  
60

Figure 1

Kondo et al.

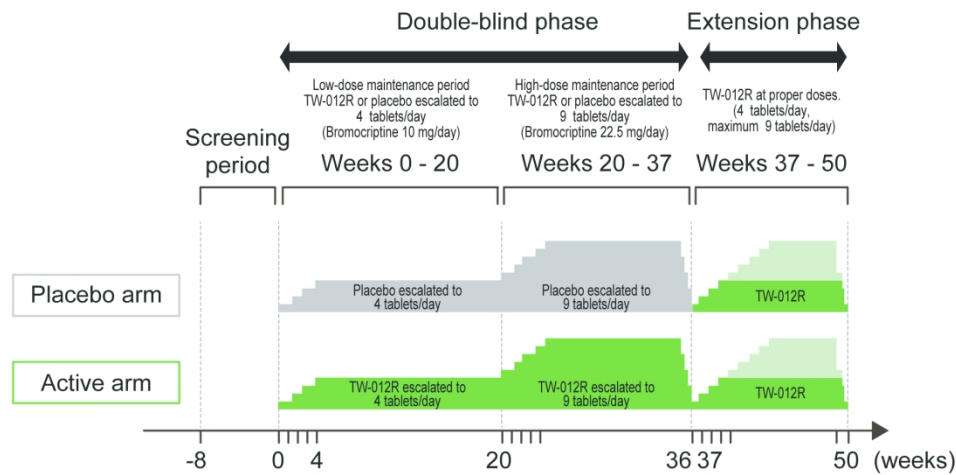

Figure 1. Design of REBRaND study

The study consists of the screening period (8 weeks), double-blind phase (37 weeks), and extension phase (13 weeks). The double-blind phase for evaluating the efficacy and safety is composed of the low-dose maintenance period (up to 10 mg/day), high-dose maintenance period (up to 22.5 mg/day), and tapering period of the trial drug. Additionally, there is an open-labelled active drug extension period (up to 10 or 22.5 mg/day) for evaluating long-term safety.



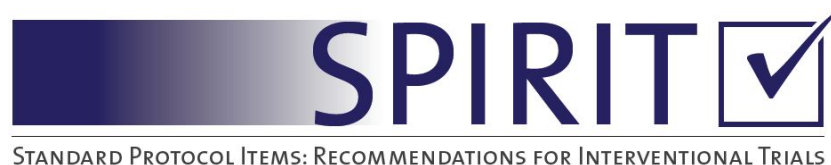

STANDARD PROTOCOL ITEMS: RECOMMENDATIONS FOR INTERVENTIONAL TRIALS

SPIRIT 2013 Checklist: Recommended items to address in a clinical trial protocol and related documents\*

| Section/item                      | Item No | Description                                                                                                                                                                                                                                                                              | Addressed on page number |
|-----------------------------------|---------|------------------------------------------------------------------------------------------------------------------------------------------------------------------------------------------------------------------------------------------------------------------------------------------|--------------------------|
| <b>Administrative information</b> |         |                                                                                                                                                                                                                                                                                          |                          |
| Title                             | 1       | Descriptive title identifying the study design, population, interventions, and, if applicable, trial acronym                                                                                                                                                                             | <u>1</u>                 |
| Trial registration                | 2a      | Trial identifier and registry name. If not yet registered, name of intended registry                                                                                                                                                                                                     | <u>3</u>                 |
|                                   | 2b      | All items from the World Health Organization Trial Registration Data Set                                                                                                                                                                                                                 | <u>6-10, Table 1</u>     |
| Protocol version                  | 3       | Date and version identifier                                                                                                                                                                                                                                                              | <u>Suppl (protocol)</u>  |
| Funding                           | 4       | Sources and types of financial, material, and other support                                                                                                                                                                                                                              | <u>15</u>                |
| Roles and responsibilities        | 5a      | Names, affiliations, and roles of protocol contributors                                                                                                                                                                                                                                  | <u>1,14</u>              |
|                                   | 5b      | Name and contact information for the trial sponsor                                                                                                                                                                                                                                       | <u>1,15</u>              |
|                                   | 5c      | Role of study sponsor and funders, if any, in study design; collection, management, analysis, and interpretation of data; writing of the report; and the decision to submit the report for publication, including whether they will have ultimate authority over any of these activities | <u>16,17</u>             |
|                                   | 5d      | Composition, roles, and responsibilities of the coordinating centre, steering committee, endpoint adjudication committee, data management team, and other individuals or groups overseeing the trial, if applicable (see Item 21a for data monitoring committee)                         | <u>11</u>                |

1 **Introduction**

2

3 Background and rationale 6a Description of research question and justification for undertaking the trial, including summary of relevant studies (published and unpublished) examining benefits and harms for each intervention 5, 6

4

5

6 6b Explanation for choice of comparators 6

7

8 Objectives 7 Specific objectives or hypotheses 6

9

10 Trial design 8 Description of trial design including type of trial (eg, parallel group, crossover, factorial, single group), allocation ratio, and framework (eg, superiority, equivalence, noninferiority, exploratory) 6

11

12

13

14 **Methods: Participants, interventions, and outcomes**

15

16 Study setting 9 Description of study settings (eg, community clinic, academic hospital) and list of countries where data will be collected. Reference to where list of study sites can be obtained 1, 3, 8

17

18

19 Eligibility criteria 10 Inclusion and exclusion criteria for participants. If applicable, eligibility criteria for study centres and individuals who will perform the interventions (eg, surgeons, psychotherapists) 6, 22, 23

20

21

22 Interventions 11a Interventions for each group with sufficient detail to allow replication, including how and when they will be administered 7, 8, Table 1

23

24

25 11b Criteria for discontinuing or modifying allocated interventions for a given trial participant (eg, drug dose change in response to harms, participant request, or improving/worsening disease) 8

26

27

28 11c Strategies to improve adherence to intervention protocols, and any procedures for monitoring adherence (eg, drug tablet return, laboratory tests) 7, 8

29

30

31 11d Relevant concomitant care and interventions that are permitted or prohibited during the trial 6, 8

32

33

34 Outcomes 12 Primary, secondary, and other outcomes, including the specific measurement variable (eg, systolic blood pressure), analysis metric (eg, change from baseline, final value, time to event), method of aggregation (eg, median, proportion), and time point for each outcome. Explanation of the clinical relevance of chosen efficacy and harm outcomes is strongly recommended 9, 10, Table 1

35

36

37

38

39

40 Participant timeline 13 Time schedule of enrolment, interventions (including any run-ins and washouts), assessments, and visits for participants. A schematic diagram is highly recommended (see Figure) Figure 1, Table 1

41

42

43

44

45

46

1 Sample size 14 Estimated number of participants needed to achieve study objectives and how it was determined, including 7  
 2 clinical and statistical assumptions supporting any sample size calculations

3  
 4 Recruitment 15 Strategies for achieving adequate participant enrolment to reach target sample size 6, 7  
 5

6 **Methods: Assignment of interventions (for controlled trials)**

7  
 8 Allocation:

9  
 10 Sequence 16a Method of generating the allocation sequence (eg, computer-generated random numbers), and list of any 9  
 11 generation factors for stratification. To reduce predictability of a random sequence, details of any planned restriction  
 12 (eg, blocking) should be provided in a separate document that is unavailable to those who enrol participants  
 13 or assign interventions  
 14

15  
 16 Allocation 16b Mechanism of implementing the allocation sequence (eg, central telephone; sequentially numbered, 9  
 17 concealment opaque, sealed envelopes), describing any steps to conceal the sequence until interventions are assigned  
 18 mechanism  
 19

20 Implementation 16c Who will generate the allocation sequence, who will enrol participants, and who will assign participants to 9  
 21 interventions  
 22

23  
 24 Blinding (masking) 17a Who will be blinded after assignment to interventions (eg, trial participants, care providers, outcome 9  
 25 assessors, data analysts), and how  
 26

27 17b If blinded, circumstances under which unblinding is permissible, and procedure for revealing a participant's 9  
 28 allocated intervention during the trial  
 29  
 30

31 **Methods: Data collection, management, and analysis**

32  
 33 Data collection 18a Plans for assessment and collection of outcome, baseline, and other trial data, including any related 9, 10, Table 1  
 34 methods processes to promote data quality (eg, duplicate measurements, training of assessors) and a description of  
 35 study instruments (eg, questionnaires, laboratory tests) along with their reliability and validity, if known.  
 36 Reference to where data collection forms can be found, if not in the protocol  
 37

38  
 39 18b Plans to promote participant retention and complete follow-up, including list of any outcome data to be 7, 8  
 40 collected for participants who discontinue or deviate from intervention protocols  
 41  
 42

|    |                                 |     |                                                                                                                                                                                                                                                                                                                                       |                   |
|----|---------------------------------|-----|---------------------------------------------------------------------------------------------------------------------------------------------------------------------------------------------------------------------------------------------------------------------------------------------------------------------------------------|-------------------|
| 1  | Data management                 | 19  | Plans for data entry, coding, security, and storage, including any related processes to promote data quality (eg, double data entry; range checks for data values). Reference to where details of data management procedures can be found, if not in the protocol                                                                     | <u>11</u>         |
| 2  |                                 |     |                                                                                                                                                                                                                                                                                                                                       |                   |
| 3  |                                 |     |                                                                                                                                                                                                                                                                                                                                       |                   |
| 4  |                                 |     |                                                                                                                                                                                                                                                                                                                                       |                   |
| 5  | Statistical methods             | 20a | Statistical methods for analysing primary and secondary outcomes. Reference to where other details of the statistical analysis plan can be found, if not in the protocol                                                                                                                                                              | <u>11</u>         |
| 6  |                                 |     |                                                                                                                                                                                                                                                                                                                                       |                   |
| 7  |                                 |     |                                                                                                                                                                                                                                                                                                                                       |                   |
| 8  |                                 | 20b | Methods for any additional analyses (eg, subgroup and adjusted analyses)                                                                                                                                                                                                                                                              | <u>11</u>         |
| 9  |                                 |     |                                                                                                                                                                                                                                                                                                                                       |                   |
| 10 |                                 | 20c | Definition of analysis population relating to protocol non-adherence (eg, as randomised analysis), and any statistical methods to handle missing data (eg, multiple imputation)                                                                                                                                                       | <u>11</u>         |
| 11 |                                 |     |                                                                                                                                                                                                                                                                                                                                       |                   |
| 12 |                                 |     |                                                                                                                                                                                                                                                                                                                                       |                   |
| 13 |                                 |     |                                                                                                                                                                                                                                                                                                                                       |                   |
| 14 | <b>Methods: Monitoring</b>      |     |                                                                                                                                                                                                                                                                                                                                       |                   |
| 15 |                                 |     |                                                                                                                                                                                                                                                                                                                                       |                   |
| 16 | Data monitoring                 | 21a | Composition of data monitoring committee (DMC); summary of its role and reporting structure; statement of whether it is independent from the sponsor and competing interests; and reference to where further details about its charter can be found, if not in the protocol. Alternatively, an explanation of why a DMC is not needed | <u>11</u>         |
| 17 |                                 |     |                                                                                                                                                                                                                                                                                                                                       |                   |
| 18 |                                 |     |                                                                                                                                                                                                                                                                                                                                       |                   |
| 19 |                                 |     |                                                                                                                                                                                                                                                                                                                                       |                   |
| 20 |                                 |     |                                                                                                                                                                                                                                                                                                                                       |                   |
| 21 |                                 |     |                                                                                                                                                                                                                                                                                                                                       |                   |
| 22 |                                 | 21b | Description of any interim analyses and stopping guidelines, including who will have access to these interim results and make the final decision to terminate the trial                                                                                                                                                               | <u>N/A</u>        |
| 23 |                                 |     |                                                                                                                                                                                                                                                                                                                                       |                   |
| 24 |                                 |     |                                                                                                                                                                                                                                                                                                                                       |                   |
| 25 | Harms                           | 22  | Plans for collecting, assessing, reporting, and managing solicited and spontaneously reported adverse events and other unintended effects of trial interventions or trial conduct                                                                                                                                                     | <u>9, Table 1</u> |
| 26 |                                 |     |                                                                                                                                                                                                                                                                                                                                       |                   |
| 27 |                                 |     |                                                                                                                                                                                                                                                                                                                                       |                   |
| 28 | Auditing                        | 23  | Frequency and procedures for auditing trial conduct, if any, and whether the process will be independent from investigators and the sponsor                                                                                                                                                                                           | <u>11</u>         |
| 29 |                                 |     |                                                                                                                                                                                                                                                                                                                                       |                   |
| 30 |                                 |     |                                                                                                                                                                                                                                                                                                                                       |                   |
| 31 |                                 |     |                                                                                                                                                                                                                                                                                                                                       |                   |
| 32 | <b>Ethics and dissemination</b> |     |                                                                                                                                                                                                                                                                                                                                       |                   |
| 33 |                                 |     |                                                                                                                                                                                                                                                                                                                                       |                   |
| 34 | Research ethics approval        | 24  | Plans for seeking research ethics committee/institutional review board (REC/IRB) approval                                                                                                                                                                                                                                             | <u>12</u>         |
| 35 |                                 |     |                                                                                                                                                                                                                                                                                                                                       |                   |
| 36 |                                 |     |                                                                                                                                                                                                                                                                                                                                       |                   |
| 37 | Protocol amendments             | 25  | Plans for communicating important protocol modifications (eg, changes to eligibility criteria, outcomes, analyses) to relevant parties (eg, investigators, REC/IRBs, trial participants, trial registries, journals, regulators)                                                                                                      | <u>12</u>         |
| 38 |                                 |     |                                                                                                                                                                                                                                                                                                                                       |                   |
| 39 |                                 |     |                                                                                                                                                                                                                                                                                                                                       |                   |
| 40 |                                 |     |                                                                                                                                                                                                                                                                                                                                       |                   |
| 41 |                                 |     |                                                                                                                                                                                                                                                                                                                                       |                   |
| 42 |                                 |     |                                                                                                                                                                                                                                                                                                                                       |                   |
| 43 |                                 |     |                                                                                                                                                                                                                                                                                                                                       |                   |
| 44 |                                 |     |                                                                                                                                                                                                                                                                                                                                       |                   |
| 45 |                                 |     |                                                                                                                                                                                                                                                                                                                                       |                   |
| 46 |                                 |     |                                                                                                                                                                                                                                                                                                                                       |                   |

|    |                               |     |                                                                                                                                                                                                                                                                                     |                                    |
|----|-------------------------------|-----|-------------------------------------------------------------------------------------------------------------------------------------------------------------------------------------------------------------------------------------------------------------------------------------|------------------------------------|
| 1  | Consent or assent             | 26a | Who will obtain informed consent or assent from potential trial participants or authorised surrogates, and how (see Item 32)                                                                                                                                                        | <u>12</u>                          |
| 2  |                               |     |                                                                                                                                                                                                                                                                                     |                                    |
| 3  |                               |     |                                                                                                                                                                                                                                                                                     |                                    |
| 4  |                               | 26b | Additional consent provisions for collection and use of participant data and biological specimens in ancillary studies, if applicable                                                                                                                                               | <u>11</u>                          |
| 5  |                               |     |                                                                                                                                                                                                                                                                                     |                                    |
| 6  |                               |     |                                                                                                                                                                                                                                                                                     |                                    |
| 7  | Confidentiality               | 27  | How personal information about potential and enrolled participants will be collected, shared, and maintained in order to protect confidentiality before, during, and after the trial                                                                                                | <u>12, 13</u>                      |
| 8  |                               |     |                                                                                                                                                                                                                                                                                     |                                    |
| 9  |                               |     |                                                                                                                                                                                                                                                                                     |                                    |
| 10 | Declaration of interests      | 28  | Financial and other competing interests for principal investigators for the overall trial and each study site                                                                                                                                                                       | <u>15, 16, 17</u>                  |
| 11 |                               |     |                                                                                                                                                                                                                                                                                     |                                    |
| 12 |                               |     |                                                                                                                                                                                                                                                                                     |                                    |
| 13 | Access to data                | 29  | Statement of who will have access to the final trial dataset, and disclosure of contractual agreements that limit such access for investigators                                                                                                                                     | <u>11, 16</u>                      |
| 14 |                               |     |                                                                                                                                                                                                                                                                                     |                                    |
| 15 |                               |     |                                                                                                                                                                                                                                                                                     |                                    |
| 16 | Ancillary and post-trial care | 30  | Provisions, if any, for ancillary and post-trial care, and for compensation to those who suffer harm from trial participation                                                                                                                                                       | <u>12</u>                          |
| 17 |                               |     |                                                                                                                                                                                                                                                                                     |                                    |
| 18 |                               |     |                                                                                                                                                                                                                                                                                     |                                    |
| 19 |                               |     |                                                                                                                                                                                                                                                                                     |                                    |
| 20 | Dissemination policy          | 31a | Plans for investigators and sponsor to communicate trial results to participants, healthcare professionals, the public, and other relevant groups (eg, via publication, reporting in results databases, or other data sharing arrangements), including any publication restrictions | <u>13</u>                          |
| 21 |                               |     |                                                                                                                                                                                                                                                                                     |                                    |
| 22 |                               |     |                                                                                                                                                                                                                                                                                     |                                    |
| 23 |                               |     |                                                                                                                                                                                                                                                                                     |                                    |
| 24 |                               | 31b | Authorship eligibility guidelines and any intended use of professional writers                                                                                                                                                                                                      | <u>14</u>                          |
| 25 |                               |     |                                                                                                                                                                                                                                                                                     |                                    |
| 26 |                               | 31c | Plans, if any, for granting public access to the full protocol, participant-level dataset, and statistical code                                                                                                                                                                     | <u>Suppl.(protocol)</u>            |
| 27 |                               |     |                                                                                                                                                                                                                                                                                     |                                    |
| 28 |                               |     |                                                                                                                                                                                                                                                                                     |                                    |
| 29 | <b>Appendices</b>             |     |                                                                                                                                                                                                                                                                                     |                                    |
| 30 |                               |     |                                                                                                                                                                                                                                                                                     |                                    |
| 31 | Informed consent materials    | 32  | Model consent form and other related documentation given to participants and authorised surrogates                                                                                                                                                                                  | <u>Suppl. (model consent form)</u> |
| 32 |                               |     |                                                                                                                                                                                                                                                                                     |                                    |
| 33 |                               |     |                                                                                                                                                                                                                                                                                     |                                    |
| 34 | Biological specimens          | 33  | Plans for collection, laboratory evaluation, and storage of biological specimens for genetic or molecular analysis in the current trial and for future use in ancillary studies, if applicable                                                                                      | <u>11</u>                          |
| 35 |                               |     |                                                                                                                                                                                                                                                                                     |                                    |
| 36 |                               |     |                                                                                                                                                                                                                                                                                     |                                    |

37 \*It is strongly recommended that this checklist be read in conjunction with the SPIRIT 2013 Explanation & Elaboration for important clarification on the items.  
 38 Amendments to the protocol should be tracked and dated. The SPIRIT checklist is copyrighted by the SPIRIT Group under the Creative Commons  
 39 "[Attribution-NonCommercial-NoDerivs 3.0 Unported](https://creativecommons.org/licenses/by-nc-nd/3.0/)" license.  
 40  
 41  
 42

# BMJ Open

## Repurposing bromocriptine for A $\beta$ metabolism in Alzheimer's disease (REBRAnD) study: Randomised Placebo-Controlled Double-Blind Comparative Trial and Open-Label Extension Trial to Investigate the Safety and Efficacy of Bromocriptine in Alzheimer's Disease with Presenilin 1 (PSEN1) Mutations

|                               |                                                                                                                                                                                                                                                                                                                                                                                                                                                                                                                                                                                                                                                                                                                                                                                                                                                                                                                                                                                                                                                                                                                                                                                                                                                                                                                                                                                                                                                                                                                                                                                                                                                                                                                                                                                                                                                                                                                                                                                                                                                                                                                                                                                         |
|-------------------------------|-----------------------------------------------------------------------------------------------------------------------------------------------------------------------------------------------------------------------------------------------------------------------------------------------------------------------------------------------------------------------------------------------------------------------------------------------------------------------------------------------------------------------------------------------------------------------------------------------------------------------------------------------------------------------------------------------------------------------------------------------------------------------------------------------------------------------------------------------------------------------------------------------------------------------------------------------------------------------------------------------------------------------------------------------------------------------------------------------------------------------------------------------------------------------------------------------------------------------------------------------------------------------------------------------------------------------------------------------------------------------------------------------------------------------------------------------------------------------------------------------------------------------------------------------------------------------------------------------------------------------------------------------------------------------------------------------------------------------------------------------------------------------------------------------------------------------------------------------------------------------------------------------------------------------------------------------------------------------------------------------------------------------------------------------------------------------------------------------------------------------------------------------------------------------------------------|
| Journal:                      | <i>BMJ Open</i>                                                                                                                                                                                                                                                                                                                                                                                                                                                                                                                                                                                                                                                                                                                                                                                                                                                                                                                                                                                                                                                                                                                                                                                                                                                                                                                                                                                                                                                                                                                                                                                                                                                                                                                                                                                                                                                                                                                                                                                                                                                                                                                                                                         |
| Manuscript ID                 | bmjopen-2021-051343.R1                                                                                                                                                                                                                                                                                                                                                                                                                                                                                                                                                                                                                                                                                                                                                                                                                                                                                                                                                                                                                                                                                                                                                                                                                                                                                                                                                                                                                                                                                                                                                                                                                                                                                                                                                                                                                                                                                                                                                                                                                                                                                                                                                                  |
| Article Type:                 | Protocol                                                                                                                                                                                                                                                                                                                                                                                                                                                                                                                                                                                                                                                                                                                                                                                                                                                                                                                                                                                                                                                                                                                                                                                                                                                                                                                                                                                                                                                                                                                                                                                                                                                                                                                                                                                                                                                                                                                                                                                                                                                                                                                                                                                |
| Date Submitted by the Author: | 22-May-2021                                                                                                                                                                                                                                                                                                                                                                                                                                                                                                                                                                                                                                                                                                                                                                                                                                                                                                                                                                                                                                                                                                                                                                                                                                                                                                                                                                                                                                                                                                                                                                                                                                                                                                                                                                                                                                                                                                                                                                                                                                                                                                                                                                             |
| Complete List of Authors:     | <p>Kondo, Takayuki; Kyoto University Center for iPS Cell Research and Application<br/>         Banno, Haruhiko; Kyoto University Center for iPS Cell Research and Application; Kyoto University Hospital, Institute for Advancement of Clinical and Translational Science<br/>         Okunomiya, Taro; Kyoto University Hospital, Institute for Advancement of Clinical and Translational Science; Kyoto University Center for iPS Cell Research and Application,<br/>         Amino, Yoko; Kyoto University Hospital, Institute for Advancement of Clinical and Translational Science<br/>         Endo, Kayoko; Kyoto University Hospital, Institute for Advancement of Clinical and Translational Science<br/>         Nakakura, Akiyoshi; Kyoto University Hospital, Institute for Advancement of Clinical and Translational Science<br/>         Uozumi, Ryuji; Kyoto University Graduate School of Medicine Faculty of Medicine, Department of Biomedical Statistics and Bioinformatics<br/>         Kinoshita, Akemi; Kyoto University Hospital, Institute for Advancement of Clinical and Translational Science<br/>         Tada, Harue; Kyoto University Hospital, Institute for Advancement of Clinical and Translational Science<br/>         Morita, Satoshi; Kyoto University Graduate School of Medicine Faculty of Medicine, Department of Biomedical Statistics and Bioinformatics<br/>         Ishikawa, Hidehiro; Mie University Graduate School of Medicine Faculty of Medicine, Neurology<br/>         Shindo, Akihiro; Mie University Graduate School of Medicine Faculty of Medicine, Neurology<br/>         Yasuda, Ken; Kyoto University Graduate School of Medicine Faculty of Medicine, Department of Neurology<br/>         Taruno, Yosuke; Kyoto University Graduate School of Medicine Faculty of Medicine, Department of Neurology<br/>         Maki, Takakuni; Kyoto University Graduate School of Medicine Faculty of Medicine, Department of Neurology<br/>         Suehiro, Takashi; Osaka University Graduate School of Medicine Department of Psychiatry<br/>         Mori, Kohji; Osaka University Graduate School of Medicine Department of</p> |

|                                    |                                                                                                                                                                                                                                                                                                                                                                                                                                                                                                                                                                                                                                                                                                                                                                                                                                                                                                                                                                                                                                                                                                                                                                                                                          |
|------------------------------------|--------------------------------------------------------------------------------------------------------------------------------------------------------------------------------------------------------------------------------------------------------------------------------------------------------------------------------------------------------------------------------------------------------------------------------------------------------------------------------------------------------------------------------------------------------------------------------------------------------------------------------------------------------------------------------------------------------------------------------------------------------------------------------------------------------------------------------------------------------------------------------------------------------------------------------------------------------------------------------------------------------------------------------------------------------------------------------------------------------------------------------------------------------------------------------------------------------------------------|
|                                    | <p>Psychiatry<br/>Ikeda, Manabu; Osaka University Graduate School of Medicine<br/>Department of Psychiatry<br/>Fujita, Koji; Tokushima University Hospital, Neurology<br/>Izumi, Yuishin; Tokushima University Hospital, Neurology<br/>Kanemaru, Kazutomi; Tokyo Metropolitan Geriatric Hospital<br/>Ishii, Kenji; Tokyo Metropolitan Institute of Gerontology<br/>Shigenobu, Kazue; Koeki Zaidan Hojin Asakayama Byoin<br/>Kutoku, Yumiko; Kawasaki Medical School, Neurology<br/>Sunada, Yoshihide; Kawasaki Medical School, Neurology<br/>Kawakatsu, Shinobu; Fukushima Medical University Aizu Medical Center<br/>Shiota, Shunji; Time Therapeutics, Inc., Corporate Planning<br/>Watanabe, Toshifumi; Time Therapeutics, Inc.<br/>Uchikawa, Osamu; Towa Pharmaceutical Co Ltd<br/>Takahashi, Ryosuke; Kyoto University Graduate School of Medicine<br/>Faculty of Medicine, Department of Neurology;<br/>Tomimoto, Hidekazu; Mie University Graduate School of Medicine<br/>Faculty of Medicine, Department of Neurology<br/>Inoue, Haruhisa; Kyoto University Center for iPS Cell Research and<br/>Application; Kyoto University Hospital, Institute for Advancement of<br/>Clinical and Translational Science</p> |
| <b>Primary Subject<br>Heading</b>: | Neurology                                                                                                                                                                                                                                                                                                                                                                                                                                                                                                                                                                                                                                                                                                                                                                                                                                                                                                                                                                                                                                                                                                                                                                                                                |
| Secondary Subject Heading:         | Mental health, Pharmacology and therapeutics                                                                                                                                                                                                                                                                                                                                                                                                                                                                                                                                                                                                                                                                                                                                                                                                                                                                                                                                                                                                                                                                                                                                                                             |
| Keywords:                          | Dementia < NEUROLOGY, Clinical trials < THERAPEUTICS, Neurogenetics<br>< NEUROLOGY, Neurology < INTERNAL MEDICINE, Neurobiology <<br>NATURAL SCIENCE DISCIPLINES                                                                                                                                                                                                                                                                                                                                                                                                                                                                                                                                                                                                                                                                                                                                                                                                                                                                                                                                                                                                                                                         |
|                                    |                                                                                                                                                                                                                                                                                                                                                                                                                                                                                                                                                                                                                                                                                                                                                                                                                                                                                                                                                                                                                                                                                                                                                                                                                          |

SCHOLARONE™  
Manuscripts



I, the Submitting Author has the right to grant and does grant on behalf of all authors of the Work (as defined in the below author licence), an exclusive licence and/or a non-exclusive licence for contributions from authors who are: i) UK Crown employees; ii) where BMJ has agreed a CC-BY licence shall apply, and/or iii) in accordance with the terms applicable for US Federal Government officers or employees acting as part of their official duties; on a worldwide, perpetual, irrevocable, royalty-free basis to BMJ Publishing Group Ltd ("BMJ") its licensees and where the relevant Journal is co-owned by BMJ to the co-owners of the Journal, to publish the Work in this journal and any other BMJ products and to exploit all rights, as set out in our [licence](#).

The Submitting Author accepts and understands that any supply made under these terms is made by BMJ to the Submitting Author unless you are acting as an employee on behalf of your employer or a postgraduate student of an affiliated institution which is paying any applicable article publishing charge ("APC") for Open Access articles. Where the Submitting Author wishes to make the Work available on an Open Access basis (and intends to pay the relevant APC), the terms of reuse of such Open Access shall be governed by a Creative Commons licence – details of these licences and which [Creative Commons](#) licence will apply to this Work are set out in our licence referred to above.

Other than as permitted in any relevant BMJ Author's Self Archiving Policies, I confirm this Work has not been accepted for publication elsewhere, is not being considered for publication elsewhere and does not duplicate material already published. I confirm all authors consent to publication of this Work and authorise the granting of this licence.



## Title

Repurposing bromocriptine for A $\beta$  metabolism in Alzheimer's disease (REBRAnD) study: Randomised Placebo-Controlled Double-Blind Comparative Trial and Open-Label Extension Trial to Investigate the Safety and Efficacy of Bromocriptine in Alzheimer's Disease with Presenilin 1 (PSEN1) Mutations

## Authors

Takayuki Kondo<sup>1,†</sup>, Haruhiko Banno<sup>1,2,†</sup>, Taro Okunomiya<sup>1,2</sup>, Yoko Amino<sup>2</sup>, Kayoko Endo<sup>2</sup>, Akiyoshi Nakakura<sup>2</sup>, Ryuji Uozumi<sup>2</sup>, Akemi Kinoshita<sup>2</sup>, Harue Tada<sup>2</sup>, Satoshi Morita<sup>2</sup>, Hidehiro Ishikawa<sup>3</sup>, Akihiro Shindo<sup>3</sup>, Ken Yasuda<sup>4</sup>, Yosuke Taruno<sup>4</sup>, Takakuni Maki<sup>4</sup>, Takashi Suehiro<sup>5</sup>, Kohji Mori<sup>5</sup>, Manabu Ikeda<sup>5</sup>, Koji Fujita<sup>6</sup>, Yuishin Izumi<sup>6</sup>, Kazutomi Kanemaru<sup>7</sup>, Kenji Ishii<sup>8</sup>, Kazue Shigenobu<sup>9</sup>, Yumiko Kutoku<sup>10</sup>, Yoshihide Sunada<sup>10</sup>, Shinobu Kawakatsu<sup>11</sup>, Shunji Shiota<sup>12</sup>, Toshifumi Watanabe<sup>12</sup>, Osamu Uchikawa<sup>13</sup>, Ryosuke Takahashi<sup>4</sup>, Hidekazu Tomimoto<sup>3,‡</sup>, Haruhisa Inoue<sup>1,2,‡</sup>

## Author affiliations

1. CiRA Center for iPS Cell Research and Application (CiRA), Kyoto University, Kyoto, Japan
2. iACT Institute for Advancement of Clinical and Translational Science (iACT), Kyoto University Hospital, Kyoto, Japan
3. Department of Neurology, Mie University Graduate School of Medicine, Tsu, Japan.
4. Department of Neurology, Graduate School of Medicine, Kyoto University, Kyoto, Japan
5. Department of Psychiatry, Osaka University Graduate School of Medicine, Suita, Japan
6. Department of Neurology, Tokushima University Graduate School of Biomedical Sciences, Tokushima, Japan
7. Department of Stroke, Tokyo Metropolitan Geriatric Medical Center, Tokyo, Japan
8. Research Team for Neuroimaging, Tokyo Metropolitan Institute of Gerontology, Tokyo, Japan
9. Department of Neuropsychiatry, Asakayama Hospital, Sakai, Japan
10. Department of Neurology, Kawasaki Medical School, Kurashiki, Japan
11. Department of Neuropsychiatry, Aizu Medical Center, Fukushima Medical University, Fukushima, Japan
12. Time Therapeutics, Inc., Kyoto, Japan
13. Towa Pharmaceutical Co., Ltd., Kadoma, Japan

† : equal contribution, ‡ : equal contribution for correspondence

**Contact information**

Haruhisa Inoue

haruhisa@cira.kyoto-u.ac.jp

CiRA Center for iPS Cell Research and Application (CiRA), Kyoto University, Kyoto, Japan

Hidekazu Tomimoto

tomimoto@clin.medic.mie-u.ac.jp

Department of Neurology, Mie University Graduate School of Medicine, Tsu, Japan

**Key words**

Alzheimer disease, clinical trial, presenilin-1, induced pluripotent stem cells, bromocriptine

3853 words

## ABSTRACT

### Introduction

Alzheimer's disease (AD) is one of the most common causes of dementia. Pathogenic variants in the PSEN1 gene are the most frequent cause of early-onset AD. Medications for patients with AD bearing PSEN1 mutation (PSEN1-AD) are limited to symptomatic therapies and no established radical treatments are available. Induced pluripotent stem cell (iPSC)-based drug repurposing identified bromocriptine as a therapeutic candidate for PSEN1-AD. In this study, we used an enrichment strategy with iPSCs to select the study population, and we will investigate the safety and efficacy of an orally administered dose of bromocriptine in patients with PSEN1-AD.

### Methods and analysis

This is a multi-centre, randomised, placebo-controlled trial. AD patients with PSEN1 mutations and a Mini Mental State Examination-Japanese (MMSE-J) score of  $\leq 25$  will be randomly assigned, at a 2 : 1 ratio, to the trial drug or placebo group ( $\geq 4$  patients in TW-012R and  $\geq 2$  patients in placebo). This clinical trial consists of a screening period, double-blind phase (9 months), and extension phase (3 months). The double-blind phase for evaluating the efficacy and safety is composed of the low-dose maintenance period (10 mg/day), high-dose maintenance period (22.5 mg/day), and tapering period of the trial drug. Additionally, there is an open-labelled active drug extension period for evaluating long-term safety. Primary outcomes are safety and efficacy in cognitive and psychological function. Also, exploratory investigations for the efficacy of bromocriptine by neurological scores and biomarkers will be conducted.

### Ethics and dissemination

The proposed trial is conducted according to the Declaration of Helsinki, and was approved by the Institutional Review Board (K070). The study results are expected to be disseminated at international or national conferences and published in international journals following the peer-review process.

### Trial registration number

jRCT2041200008 (Japan Registry of Clinical Trials), NCT 04413344 (ClinicalTrials.gov)

## ARTICLE SUMMARY

### Strengths and limitations of this study

- This trial will provide the safety and efficacy data of bromocriptine for Alzheimer's disease patients with mutations in the PSEN1 gene (PSEN1-AD).
- Bromocriptine is an approved drug with safety information accumulated over decades.
- The trial design includes enrichment of the patient population by induced pluripotent stem cell (iPSC) technology.
- Minimally invasive biomarkers, using plasma samples, PET and digital tools, will be investigated in addition to A $\beta$  and tau in cerebrospinal fluid samples.
- A possible limitation may be a difficulty in recruiting a large-enough number of patients due to the rarity of PSEN1-AD.

## INTRODUCTION

Alzheimer's disease (AD) was first reported by Dr. Alois Alzheimer in 1906, and it is now regarded as the most prevalent neurodegenerative disease, accounting for 60–80% of dementia cases. Over 50 million people are estimated to live with dementia globally, a figure set to increase to 152 million by 2050 [1]. The number of AD patients is also expected to increase explosively in Japan in line with our super-aging society. Although this disease should be treated promptly, available treatments are limited to several symptomatic therapies [2].

AD is a neurodegenerative disease that presents clinical symptoms, primarily including progressive decline in memory. Elucidation of the central pathology of AD began in the 1980s with the identification of amyloid  $\beta$ -protein ( $A\beta$ ) by biochemical methods.  $A\beta$  is a major component of senile plaques, which represent a pathological characteristic of AD. Subsequently, in the 1990s, genetic approaches identified the  $A\beta$  precursor protein (APP), presenilin 1 (PSEN1), and presenilin 2 (PSEN2) as causative genes for familial AD, thereby rapidly advancing the understanding of such condition [3]. Notably, AD patients with mutations in the PSEN1 gene (PSEN1-AD) experience onset in their 20s to 50s, and their cognitive function deteriorates rapidly, leading to death within several years, as curative therapies are unavailable [4]. Thus, the development of new drugs for PSEN1-AD is eagerly awaited. Converging basic and clinical evidence suggests that mutant PSEN1 could affect the function of  $\gamma$ -secretases in neurons and increase the  $A\beta_{42}$  levels in plasma of FAD patients, transfected cells, and transgenic mice [5,6,7]. This abnormal production of  $A\beta$  was estimated to originate from the altered conformation of the  $\gamma$ -secretase complex and changes in the active site of the cleavage process [8,9].

To develop therapeutic compounds for PSEN1-AD, we previously established induced pluripotent stem cells (iPSCs) from patients with PSEN1-AD. iPSCs were established by introducing a small number of genes into patients' cells. Established iPSCs can differentiate into any type of cell in the body and proliferate indefinitely. iPSC technology provided *in vitro* models of inaccessible human cell types and impacted investigations of disease mechanisms especially in brain disorders. We established an iPSC-based screening system by modelling  $A\beta$  phenotypes of PSEN1-AD [10]. We utilised an existing drug library the safety and pharmacokinetic profile of which had already been confirmed clinically and approved for use in humans [10]. After the screening, we found bromocriptine to be the most potent modifier of  $A\beta$  production for PSEN1-AD neurons among existing drugs. Dose-dependency assay showed that bromocriptine reduced the  $A\beta_{42}$  dose and  $A\beta_{42}/40$  ratio by up to ~50% and ~40%, respectively. Furthermore, we prepared cortical neurons of several patients with PSEN1-AD and sporadic AD to evaluate the specificity of bromocriptine for PSEN1-AD. Bromocriptine

1  
2  
3  
4 reduced the A $\beta$ 42 dose and A $\beta$ 42/40 ratio of PSEN1-AD neurons more strongly than those of sporadic  
5 AD neurons. From these results, we selected patients with PSEN1-AD as a bromocriptine-responsive  
6 subgroup in AD [11,12].  
7

8  
9 Bromocriptine is an already approved drug with few safety concerns and a long history of usage  
10 in clinical settings. Bromocriptine was approved for the treatment of Parkinson's disease (approved  
11 dosage 22.5mg/day) [13], pituitary tumour, and hyperprolactinaemia, and was proven to penetrate the  
12 blood-brain barrier. Based on iPSC studies, as we hypothesised that bromocriptine might attenuate the  
13 clinical symptoms of PSEN1-AD patients, we decided to conduct a clinical trial to evaluate the safety  
14 and efficacy of the first-time administration to PSEN1-AD patients as an investigator-initiated clinical  
15 trial (exploratory study), which will confirm its safety and provide evidence of its efficacy.  
16  
17  
18  
19  
20  
21

## 22 **OBJECTIVES**

23  
24 The aim of this study is to investigate the safety and efficacy of an orally administered dose of  
25 bromocriptine in patients with PSEN1-AD using a placebo group as control. In addition, long-term  
26 safety will be examined in an open-label extension trial.  
27  
28  
29

## 30 **METHODS AND ANALYSIS**

### 31 **Trial population and rationale for selecting participants**

32  
33 The following patients will be included in this study. Detailed eligibility criteria are presented in  
34 "Box 1". This ongoing clinical trial started to enrol participants in June 2020. The study is planned to  
35 end in March 2022.  
36  
37  
38  
39

- 40  
41 ► Alzheimer's disease patients with PSEN1 mutations (PSEN1-AD)
- 42  
43 ► Patients diagnosed with "probable AD" according to the diagnostic guideline of NIA-AA [14] or  
44 "probable Alzheimer-type dementia" according to the diagnostic criteria for Alzheimer's disease  
45 specified in DSM-5 [15]
- 46  
47 ► Mini Mental State Examination-Japanese (MMSE-J) score of  $\leq 25$   
48  
49  
50

51  
52 PSEN1-AD is the target disease. The MMSE-J score will be specified at 25 points or lower to  
53 enrol patients with dementia and mild cognitive impairment and to exclude those with normal  
54 cognitive function. We will exclude MCI participants with MMSE-J scores of 26 or 27, who are  
55 reported to have lower risk and longer duration of MCI conversion to AD [16]. The concomitant use  
56  
57  
58  
59  
60

1  
2  
3  
4 of existing drugs for the treatment of AD (donepezil, galantamine, rivastigmine, and memantine) will  
5 be allowed to evaluate the safety and efficacy of future practical bromocriptine use upon approval, but  
6 patients who have changed their regimen within 2 months before providing informed consent will be  
7 excluded because the efficacy of bromocriptine alone will be difficult to evaluate. Patients taking oral  
8 donepezil hydrochloride will be carefully monitored because the blood concentration may be increased  
9 by the additional oral administration of the trial drug. Recruiting will be done by neurologists who  
10 treat PSEN1-AD patients and are blinded to their allocation. All participants in the study need to be  
11 confirmed for the presence of PSEN-1 mutation by genetic analyses. Given that PSEN1-AD patients  
12 are very few, the planned feasible recruitment duration will be 10 months.  
13  
14  
15  
16  
17  
18  
19  
20

### 21 **Sample size**

22 The number of PSEN1-AD patients confirmed by genetic diagnosis in Japan is approximately  
23 100 according to the Japanese Familial Alzheimer's Disease (JFAD) database [17] and a report of a  
24 research project on the support system for individuals with familial AD and their families in Japan  
25 [18]. This number corresponds to the global data of reported cases from Asia, the UK and the US  
26 [19,20,21]. In addition, compared with patients with sporadic AD without PSEN1 mutations, PSEN1-  
27 AD patients have a more rapid progression of cognitive decline and a more substantial decrease in the  
28 ability to perform daily living activities (ADLs) owing to the overlap of various neurologic symptoms,  
29 including spastic paralysis and extrapyramidal symptoms. Hence, the number of patients is more  
30 limited to those who meet the inclusion criteria (Box 1) in the limited trial duration. Given such rarity,  
31 the patient accumulation is extremely low and the targeted sample size for this randomised trial is  $\geq 4$   
32 patients in TW-012R and  $\geq 2$  patients in placebo based on feasibility and the aforementioned validity.  
33 Unequal randomisation will be employed because of ethical considerations. There is no formal  
34 hypothesis or power sample size calculation due to the exploratory nature of this study. Thus, we did  
35 not perform sample size calculation. To ensure that sufficient participants complete the trial, clinical  
36 research coordinators will communicate well and frequently both with the central coordinating centre  
37 and the participants/care givers.  
38  
39  
40  
41  
42  
43  
44  
45  
46  
47  
48  
49  
50

### 51 **Intervention and control**

52 This clinical trial consists of the screening period (8 weeks), double-blind phase (37 weeks), and  
53 extension phase (13 weeks). The double-blind phase for evaluating the efficacy and safety is composed  
54 of the low-dose maintenance period (20 weeks), high-dose maintenance period (16 weeks), and  
55  
56  
57  
58  
59  
60

1  
2  
3 tapering period of the trial drug (1 week). Additionally, there is an open-labelled active drug extension  
4 period for evaluating long-term safety (Figure 1). Participants who are screened during the screening  
5 period and assessed as eligible will be randomly assigned to the bromocriptine and placebo groups.  
6  
7

8 ► Intervention – bromocriptine (TW-012R, each tablet contains 2.5 mg of bromocriptine, Towa  
9 Pharmaceutical) [13]  
10

11 ► Control – placebo (tablets identical in appearance, smell and taste)  
12  
13

14 Participants will receive the trial drug in the double-blind phase, during which the low-dose  
15 maintenance period (from the start of trial treatment until Week 20) will be started with 1 tablet of  
16 TW-012R or placebo administered orally once daily. The daily dose will be increased by 1 tablet per  
17 week up to 4 tablets (10 mg) daily until Week 20 as the maintenance dose. The safety and efficacy of  
18 bromocriptine orally administered at 10 mg/day will be evaluated in comparison with the placebo.  
19 Then, the high-dose maintenance period (weeks 20–36) will be started with 5 tablets of TW-012R or  
20 placebo daily (further increased by 1 tablet from the maintenance dose of the low-dose maintenance  
21 period). The daily dose will be increased by 1 tablet per week, and a maximum of 9 tablets (22.5 mg)  
22 daily will be continued as the maintenance dose until Week 36. The safety and efficacy of  
23 bromocriptine orally administered at a dose of 22.5 mg/day will be evaluated in comparison with the  
24 placebo. During the tapering period of the trial drug (weeks 36–37), the dose of bromocriptine or  
25 placebo will be tapered to 1 tablet from the previous dose during 1 week.  
26  
27  
28  
29  
30  
31  
32  
33

34 In the extension phase (weeks 37–50), the participants in both groups will start oral administration  
35 of 1 tablet of TW-012R (2.5 mg) once daily. The daily dose will be increased by 1 tablet per week,  
36 and the administration will be continued until Week 48 at a standard dose of 4 tablets daily, with a  
37 maximum of 9 tablets, as maintenance dose to evaluate the safety of the long-term administration of  
38 bromocriptine. Then, the dose will be tapered during about 1–2 weeks to complete the treatment.  
39  
40  
41  
42

43 In all phases, “not increasing the dose” or “decreasing the dose” is allowed at the discretion of  
44 the investigator from the viewpoint of safety of the participants. Adherence will be monitored by  
45 counting empty PTP (press through pack) sheets of study drugs. Due to the COVID-19 pandemic in  
46 2020, we amended our protocol to make it possible to deliver study drugs if a participant cannot visit  
47 a medical facility. For participant retention and safety reasons, a participant will have 10 phone-call-  
48 visits in addition to monthly onsite-visits.  
49  
50  
51  
52

53 As for drug interactions, CYP3A4 inhibitors/inducers and dopamine antagonists are prohibited  
54 because bromocriptine is primarily metabolised by CYP3A4 and drug interaction is anticipated.  
55  
56  
57  
58  
59  
60



1  
2  
3 Benzodiazepines are also prohibited because they might result in reduced efficacy in the clinical  
4 phenotype, especially cognitive function.  
5

6  
7 This study will be conducted at 6 academic hospitals and 1 community hospital in Japan.

8 Standard Protocol Items: Recommendations for Interventional Trials (SPIRIT checklist) was  
9 followed in designing the study protocol.  
10  
11  
12

### 13 **Randomisation, allocation, and blinding**

14  
15 Patients meeting all the inclusion criteria and not meeting any of the exclusion criteria (Box 1) at  
16 the time of enrolment in the trial will be randomly assigned, at a 2 : 1 ratio, to receive either TW-012R  
17 or placebo. Owing to the ethical issue for patients assigned to the placebo group, unequal  
18 randomisation will be employed. Randomisation will be performed using permuted blocks and  
19 stratified based on the important confounding variable of the baseline MMSE-J score ( $< 13$  or  $\geq 13$ ).  
20 The allocation sequence will be prepared by an external contract research organization, and trial  
21 participants, care givers, outcome assessors and investigators will be blinded. Registration will be done  
22 by investigators etc. using the web enrolment system. When a patient is determined to be eligible by  
23 the web enrolment system, the allocated drug number will be displayed as the enrolment result. Under  
24 emergency circumstances such as severe adverse events, unblinding is permissible by the discretion of  
25 the coordinating investigators.  
26  
27  
28  
29  
30  
31  
32  
33  
34  
35

### 36 **Outcomes**

37  
38 Primary endpoint 1) safety

39 As the primary analysis, safety will be evaluated by collecting incidence information and severity of  
40 adverse events (AEs) or adverse reactions from the starting time of the administration of the trial drug  
41 to the end of the follow-up period (Table 1). Known frequent adverse effects of bromocriptine include  
42 nausea and vomiting (8.3%), anorexia (2.5%), and gastric discomfort, based on 5212 cases with  
43 Parkinson's syndrome [22].  
44  
45  
46  
47  
48  
49

50 Primary endpoint 2) Severe Impairment Battery-Japanese (SIB-J)

51 SIB-J is validated in the Japanese version and will be used to evaluate cognitive function [23,24,25].  
52 Higher scores indicate better cognitive function (range 0–100). Participants will be questioned and  
53 assessed by the investigator, sub-investigator, clinical psychologist or speech therapist. Individual time  
54  
55  
56  
57  
58  
59  
60

1  
2  
3 courses of observed values and changes from baseline in SIB-J score up to Week 20 and Week 36 after  
4 trial drug administration will be shown (Table 1).  
5  
6  
7

### 8 Primary endpoint 3) Neuropsychiatric Inventory (NPI)

9  
10 NPI (Japanese version) is a validated clinical instrument for evaluating psychopathology in dementia  
11 [26,27,28]. Higher scores indicate more severe neuropsychiatric derangements (range 10–120).  
12 Caregivers will be interviewed and assessed by the investigator, sub-investigator, clinical psychologist  
13 or speech therapist. Individual time courses of observed values and changes from baseline in NPI score  
14 up to Weeks 20 and 36 after trial drug administration will be shown (Table 1).  
15  
16  
17  
18  
19

### 20 Secondary endpoints

21 Changes in the following 1) to 11) will be shown individually. For the blood bromocriptine  
22 concentration on Day 1, key pharmacokinetic parameters (C<sub>max</sub>, T<sub>max</sub>) will be calculated (Table 1).  
23  
24  
25  
26

- 27 1) Mental Function Impairment Scale (MENFIS) [29]
- 28 2) MMSE-J [30,31,32]
- 29 3) Disability Assessment for Dementia (DAD) [33]
- 30 4) Movement Disorder Society-sponsored revision of the Unified Parkinson's Disease Rating  
31 Scale (MDS-UPDRS) Part III [34]
- 32 5) Apathy Evaluation Scale Informant Version [35,36]
- 33 6) Plasma A $\beta$  protein [37]
- 34 7) Plasma neurofilament light chain protein (NfL) [38]
- 35 8) Plasma total tau and plasma phosphorylated tau protein [37,39,40,41]
- 36 9) Cerebrospinal fluid A $\beta$  (CSF A $\beta$ ) [42,43]
- 37 10) Cerebrospinal fluid total tau and phosphorylated tau protein (CSF total/p-tau) [42,43]
- 38 11) Blood bromocriptine concentration  
39  
40  
41  
42  
43  
44  
45  
46  
47  
48  
49

### 50 Reference endpoints

51 For exploratory purposes, additional measurement with wearable physical activity meter  
52 (Silmee™W20, TDK Corporation, Tokyo, Japan), measurement with finger tapping device (UB-2,  
53 Maxell, Ltd. Tokyo, Japan), brain amyloid PET [44], brain tau PET [45], Upper Motor Neuron Burden  
54 Score (UMNB) [46], and plasma A $\beta$ -related peptides [47] will be assessed as reference endpoints  
55  
56  
57  
58  
59  
60

(Table 1). The wearable physical activity meter continuously monitors activity, sleep habits, amount of speech, time of physical movement, and heart rate variability. Finger tapping is correlated with cognitive function and parkinsonian signs, and it allows obtaining parameters directly related to ADLs not limited to cognitive function evaluated by questionnaires.

All neuropsychological testing will be conducted by certified physicians or psychologists who completed the assessment training of this trial. Learning effect cannot be negligible, but this trial has a placebo arm, and previous trials using SIB-J, NPI, MENFIS and DAD adopted similar measuring time frames and no obvious learning effects were reported [48,49].

### **Data management, monitoring, and auditing**

The Data Centre will manage the data using the participant identification code or enrolment number. In direct access to source data related to the conduct of this trial, the participants' informed consent forms, and publication of the trial results, full consideration should be given to the protection of privacy and personal information, such as the participants' names and diseases. The full dataset without personal identifiable information will be accessed by data managers, statisticians and investigators. An independent data monitoring committee has been established to assess the safety data.

Trial auditing will be conducted multiple times by an outside contract research organization. Biological specimens will be preserved for future use in ancillary studies with the participants' consent.

### **Statistical analysis**

Safety analyses will be performed for patients who undergo at least part of the trial treatment. Efficacy analyses will be performed among patients who undergo at least part of the trial treatment, provide efficacy information, and satisfy study inclusion criteria. Descriptive statistics will be used to analyse safety data; results will be summarised as counts and percentages. For efficacy endpoints, changes from baseline will be summarised and compared at weeks 20 and 36 using descriptive statistics including mean differences with 95% confidence intervals and *p* values derived from Student's *t* test with the assumption of normality. If the assumption is violated, nonparametric tests will be considered. No imputation will be performed for missing data. Owing to the exploratory nature of this study, no adjustments will be made for multiple testing. To support the robustness of the results, a sensitivity analysis with and without non-compliant patients will be conducted. A subgroup analysis in accordance with the baseline MMSE-J score ( $< 13$  or  $\geq 13$ ) will be performed to investigate the

1  
2  
3 patient response to bromocriptine. All statistical analyses will be performed using SAS software,  
4 version 9.4 or higher (SAS Institute, Cary, NC). The statistical analysis plan will be developed prior  
5 to database lock.  
6  
7  
8  
9

### 10 **Patient and public involvement**

11  
12 No patient or public were involved in this study design. However, in the design of this study,  
13 patients and their family burdens were assessed with the help of neurologists and clinical trial  
14 coordinators of Kyoto University Hospital.  
15  
16  
17  
18  
19

### 20 **ETHICS AND DISSEMINATION**

21  
22 This trial will be conducted in compliance with the ethical principles that have their origin in the  
23 Declaration of Helsinki (1964) and its revisions, namely, “Act on Securing Quality, Efficacy and  
24 Safety of Products including Pharmaceuticals and Medical Devices,” “Ministerial Ordinance on Good  
25 Clinical Practice for Drugs,” and its related notifications, written procedures, and this protocol. This  
26 trial was approved by the Institutional Review Board (K070, Kyoto University Hospital; F-2020-016,  
27 Mie University Hospital; 209001-A, Osaka University Hospital; 2105 (02-5), Tokushima University  
28 Hospital; T19-04 Tokyo Metropolitan Geriatric Hospital; 20200421, Kawasaki Medical School  
29 Hospital; 20200624, Asakayama Hospital).  
30  
31  
32  
33  
34  
35

36 The investigator will prepare the written information for participants and the informed consent  
37 form and will obtain approval from the Institutional Review Board in advance. Items to be described  
38 in the written information shall be prepared based on Article 51 of the “Ministerial Ordinance on Good  
39 Clinical Practice for Drugs”. If the investigator, etc. obtains any information that may affect the  
40 intention of the participant or the participant’s legally acceptable representative to continue to  
41 participate in the trial, he/she will promptly provide the information to the participant or the  
42 participant’s legally acceptable representative to confirm the intention of whether to continue to  
43 participate in the trial. The investigator will also promptly revise the written information, submit it to  
44 the head of the trial site, and obtain approval from the Institutional Review Board. The investigator  
45 will provide another explanation to the participant who has already been participating in the trial or  
46 his/her legally acceptable representative using the revised written information, confirm the  
47 participant’s will as to whether or not to continue participation in the trial, and obtain written consent  
48 from the participant. If an adverse event occurs due to the conduct of the trial, leading to health injury  
49  
50  
51  
52  
53  
54  
55  
56  
57  
58  
59  
60

1  
2  
3 in participants, the investigator will immediately provide the participant with appropriate diagnosis,  
4 treatment, and necessary measures including compensation insurance.  
5  
6

7 Persons involved in this trial shall comply with applicable laws and ordinances, shall exert their  
8 utmost efforts to protect personal information and privacy of the participants, and shall not leak  
9 personal information obtained in the conduct of the trial without justifiable reasons. The same shall  
10 apply after their retirement. When submitting the patient enrolment forms and case report forms, the  
11 investigator, sub-investigator, and clinical trial collaborator will use the participant identification code  
12 and will not enter information that allows persons outside the trial site to identify the participant (e.g.,  
13 name, address, and telephone number). The central trial office, data centre and statisticians will use  
14 only the participant identification codes and cannot access the participants' personal information.  
15  
16  
17  
18  
19

20 The proposed study will evaluate both the safety and efficacy of bromocriptine in PSEN1-AD,  
21 and the study results are expected to be disseminated at international and/or national conferences and  
22 published in international journals following the peer-review process.  
23  
24  
25  
26

## 27 **DISCUSSION**

28 This study evaluates the safety and explores the efficacy of bromocriptine for patients with  
29 PSEN1-AD. The potential efficacy of bromocriptine for PSEN1-AD patients has already been  
30 identified by an approach applying iPSC-based drug repurposing [10]. We previously developed a  
31 phenotypic screening system to evaluate compounds with a readout of A $\beta$ 42 reduction using familial  
32 and sporadic AD patient-iPSCs. Our high-throughput screening system revealed that bromocriptine,  
33 among 1,258 pharmaceutical compounds, reduced the A $\beta$ 42 level most effectively. This drug reduced  
34 A $\beta$ 42 by 50% in PSEN1-AD iPSCs, and by 20-30% in sporadic patient-iPSC models [10]. A recent  
35 report implies that inhibition of less than 50 percent of A $\beta$  might preserve neuronal signalling because  
36 the APP family plays an important role in synaptic plasticity underlying learning and memory [50].  
37 Thus, we designed the clinical trial for PSEN1-AD with the expectation that bromocriptine will  
38 become a candidate as a molecularly targeted drug for AD, and especially for PSEN1-AD.  
39  
40  
41  
42  
43  
44  
45  
46  
47

48 Bromocriptine is a therapeutic agent used for the treatment of patients with Parkinson's disease,  
49 and the accumulated data of long usage verifies its safety for patients with Parkinson's disease.  
50 However, evaluation of the safety of bromocriptine in AD patients is required in order to support its  
51 development for the treatment of AD. This clinical trial consists of a 20-week low-dose maintenance  
52 period followed by a 16-week high-dose maintenance period to assess its safety. For recruitment and  
53  
54  
55  
56  
57  
58  
59  
60

1  
2  
3 ethical considerations, we also added a 13-week open extension period to continue to follow the safety  
4 of the trial drug.  
5

6  
7 Safety information has been accumulated from long usage of bromocriptine since the 1970s.  
8 While nausea and vomiting are the most commonly reported adverse events, it is generally manageable  
9 by slow titration of the medication and use of antiemetics. While the occurrence and management of  
10 adverse events in AD patients seem to be comparable to those with Parkinson's disease, this study was  
11 designed to evaluate any unacceptable adverse events that specifically occur in PSEN1-AD patients.  
12 During the recruiting period of this study, the COVID-19 pandemic is influencing study recruitment,  
13 onsite monitoring, and participants' visit schedules all over the world. Our study protocol enabled the  
14 delivery of the study drugs. Further, remote informed consent and cognitive/neuropsychiatric  
15 evaluation by tablet or digital devices can be used in future trials for AD to reduce the study burden  
16 for participants and their caregivers [51].  
17  
18  
19  
20  
21  
22  
23

24 In this study we will limit the included patients to those with PSEN1-AD, because bromocriptine  
25 is most effective in PSEN1-AD patient-derived iPSCs compared to other types of familial AD and  
26 sporadic AD patients' iPSCs [11,12]. This enrichment will make it difficult to recruit many patients  
27 for this study, considering the rarity of such patients in Japan. Although the variety of clinical severities  
28 among patients is one of the reasons that cause difficulty for clinical trial evaluation, our inclusion  
29 criteria admit a broad disease-stage as we consider that PSEN1-AD patients would be the best  
30 candidates for bromocriptine administration. To explore the efficacy of the trial drug, various  
31 promising biomarkers in AD, plasma A $\beta$ , plasma A $\beta$ -related peptide, plasma NfL, plasma total/p-tau,  
32 CSF A $\beta$ , CSF total/p-tau, amyloid/tau PET, and digital biomarkers will be evaluated in this study.  
33 These biomarkers might indicate the target engagement, and its alteration might reflect the effect of  
34 bromocriptine treatment. Of note, digital biomarkers will potentially reduce participants' and  
35 caregivers' burden in future trials. Strengths of our study include participant enrichment using iPSC  
36 technology and exploratory biomarker investigation. A possible limitation of this study may be the  
37 difficulty in recruiting large numbers of patients due to the rarity of PSEN1-AD.  
38  
39  
40  
41  
42  
43  
44  
45  
46  
47

48 This study is the first to use bromocriptine for PSEN1-AD patients, and it presents both a low-  
49 and a high-dose safety verification as well as cognitive, neuropsychiatric and biomarker-based efficacy  
50 detections. This is a phase I/IIa study for the safety and early efficacy evaluation with a small number  
51 of participants. Therefore, a large-scale study will be needed in the following phases. This study may  
52 pave the way for a new and practical disease-modifying AD therapy.  
53  
54  
55  
56  
57  
58  
59  
60

### Author contributions

TK, HB, TO, YA, KE, AN, RU, AK, H Tada, SM, SS, TW, and H Inoue conceived and designed the study. AN and RU will conduct the statistical analysis. H Ishikawa, AS, TM, KY, YT, KM, TS, MI, KF, YI, KK, KI, KS, YK, YS, SK, OU, RT and H Tomimoto provided critical advice on the study design. All authors critically revised the draft and approved the final version of this manuscript.

### Acknowledgements

We would like to acknowledge and thank the members of the institute and hospitals in this study. Patients and their family burdens were assessed with the help of neurologists and clinical trial coordinators of Kyoto University Hospital. We appreciate Tetsujiro Ihara at London Iryo Centre, and Arthur Valentine and Randy Trask of Pearson Clinical Assessments (San Antonio, Texas) for providing access to the Severe Impairment Battery (SIB), which provided valuable measurement regarding the effectiveness of this protocol. We would like to express our sincere gratitude to all our co-workers and collaborators, to Atsushi Onodera and Yuji Arakawa for PMDA negotiation, and to Noriko Ito, Mikie Iijima, and Nozomi Kawabata for their administrative support.

### Funding

This trial will be conducted with funding from Time Therapeutics, Inc. (award/grant number is not applicable) and a grant from the invited project at iACT, Kyoto University Hospital (0709992110). The trial drugs will be provided by Towa Pharmaceutical Co., Ltd.

### Competing interests

TK has a patent, Agent for preventing and/or treating Alzheimer's disease, licensed to H Inoue and TK.; HB reports funding for this clinical trial from Time Therapeutics, Inc., trial drugs from Towa Pharmaceutical Co., Ltd., during the conduct of the study; personal fees from Sumitomo Dainippon Pharma Co., Ltd., outside the submitted work; RU reports personal fees from Eisai, Sawai Pharmaceutical Co., Ltd., and CAC Croit, outside the submitted work; SM reports personal fees from AstraZeneca K.K., Bristol-Myers Squibb Company, Chugai Pharmaceutical Co. Ltd., Eli Lilly Japan K.K., MSD K.K., Nippon Boehringer Ingelheim Co. Ltd., Ono Pharmaceutical Co. Ltd., Pfizer Japan Inc., and Taiho Pharmaceutical Co. Ltd.; YT reports personal fees from Sumitomo Dainippon Pharma Co., Ltd., Otsuka Pharmaceutical Co., Ltd., AbbVie GK, Kyowa Kirin Co., Ltd., Takeda

1  
2  
3  
4 Pharmaceutical Company Limited, Tsumura & Co., Eisai Co., Ltd., Sanofi K.K., Mylan EPD G.K.,  
5 and Ono Pharmaceutical Co., Ltd., outside the submitted work; TM reports personal fees from Bayer  
6 Yakuhin, Ltd., and Otsuka Pharmaceutical Co., Ltd., outside the submitted work; MI reports grants  
7 and personal fees from Eisai Co., Ltd., Sumitomo Dainippon Pharma Co., Ltd., Otsuka Pharmaceutical  
8 Co., Ltd., MSD K.K., Daiichi Sankyo Co., Ltd., and Takeda Pharmaceutical Company Limited, grants  
9 from Mitsubishi Tanabe Pharma Corporation, personal fees from Janssen Pharmaceutical K.K., Nihon  
10 Medi-Physics Co., Ltd., Fujifilm, Novartis Japan, Meiji Seika Pharma Co., Ltd., Nippon Chemiphar  
11 Co., Ltd., Eli Lilly Japan K.K., and Chugai Pharmaceutical Co., Ltd., outside the submitted work; KF  
12 reports grants from Novartis, outside the submitted work; YI reports grants from Sumitomo Dainippon  
13 Pharma Co., Ltd., Eisai Co., Ltd., Japan Blood Products Organization, Otsuka Pharmaceutical Co.,  
14 Ltd., Kyowa Kirin Co., Ltd., Teijin Pharma Limited, Nihon Pharmaceutical Co., Ltd., and FP  
15 Pharmaceutical Corporation, outside the submitted work; KI reports grants, personal fees and other  
16 from GE Healthcare, during the conduct of the study; grants and personal fees from Nihon Medi-  
17 Physics Co. Ltd., and Eli Lilly Japan K.K., personal fees and other from Eisai Co., Ltd., and Chugai  
18 Pharmaceutical Co., other from Biogen, personal fees from Novartis, outside the submitted work; YK  
19 reports personal fees from Tsumura & Co., Novartis Japan, UCB Japan Co. Ltd., and Janssen  
20 Pharmaceutical K.K., outside the submitted work; YS reports grants from Nippon Shinyaku Co., Ltd.,  
21 and The Nakatomi Foundation, personal fees from FP Pharmaceutical Corporation, Sumitomo  
22 Dainippon Pharma Co., Ltd., and Novartis Japan, outside the submitted work; SK reports grants and  
23 personal fees from Eisai Co., Ltd., personal fees from Janssen Pharmaceutical K.K., Novartis Japan,  
24 Daiichi-Sankyo, Sumitomo Dainippon Pharma Co., Ltd., Fujifilm Toyama Chemical Co., Ltd., Nippon  
25 Chemiphar, Nihon Medi-Physics Co., Ltd., Tsumura & Co., and Eli Lilly Japan K.K., outside the  
26 submitted work; SS is an employee of Time Therapeutics, Inc.; TW is an employee of Time  
27 Therapeutics, Inc., during the conduct of the study; TW reports personal fees from KanonCure Inc.,  
28 Tsubota Laboratory, Inc., Dompé Farmaceutici S.p.A., and Novaliq GmbH, outside the submitted  
29 work; OU is an employee of Towa Pharmaceutical Co., Ltd.; RT reports grants and personal fees from  
30 Takeda Pharmaceutical Co., Ltd., Nippon Boehringer Ingelheim Co., Ltd., Sumitomo Dainippon  
31 Pharma Co., Ltd., Eisai Co., Ltd., Kyowa Kirin Co., Ltd., Otsuka Pharmaceutical Co., Ltd., and Sanofi  
32 K.K., grants from Astellas Pharma Inc., Novartis Japan, and Nihon Medi-Physics Co. Ltd., personal  
33 fees from AbbVie GK, Mitsubishi Tanabe Pharma Corporation, Mylan N.V., Japan Blood Products  
34 Organization, Sanwa Kagaku Kenkyusho Co., Ltd., FP Pharmaceutical Corporation, Tsumura & Co.,  
35 KAN Research Institute, Inc., Kissei Pharmaceutical Co., Ltd., Chugai Pharmaceutical Co., Ltd., and



1  
2  
3  
4 Biogen Inc., outside the submitted work; H Tomimoto reports personal fees from Daiichi Sankyo Co.,  
5 Ltd., outside the submitted work; H Inoue possesses reports grants and personal fees from Takeda  
6 Pharmaceutical Co., Ltd., Eisai Co., Ltd., Suntory Wellness Limited, Institute for Health Care Science,  
7 and Mitsubishi Tanabe Pharma Corporation, grants from Taisho Pharmaceutical Co., Ltd., Toray  
8 Industries, Inc., KAN Research Institute, Inc., Shimadzu Corporation, MicroBiopharm Japan Co., Ltd.,  
9 Kaneka Corporation, Panasonic Corporation, Biogen Inc., and Stem Cell & Device Laboratory, Inc.  
10 (SCAD), personal fees from Nomura Securities Co., Ltd., FP Pharmaceutical Corporation, Nippon  
11 Chemiphar Co., Ltd., Kansai Pharmaceutical Industries Association, Otsuka Pharmaceutical Co., Ltd.,  
12 Kyowa Kirin Co., Ltd., outside the submitted work. H Inoue possesses unlisted stocks of Time  
13 Therapeutics, Inc. In addition, Kyoto University grants an exclusive license to Time Therapeutics, Inc.  
14 through iPS Academia Japan, Inc. regarding the invention of the trial drug (intellectual property) which  
15 was discovered through drug screening by the principal investigator (H Inoue). Thereby, Kyoto  
16 University and the principal investigator obtain a patent income from Time Therapeutics, Inc. H Inoue  
17 does not engage in data management, monitoring and statistical analyses. The coordinating  
18 investigators (H Tomimoto and HB) and Time Therapeutics, Inc. will conduct the trial under the  
19 investigator-initiated clinical trial agreement. Prior to the trial, the principal investigator and the  
20 coordinating investigators underwent a review and received approval by the Conflict of Interest  
21 Review Committee based on the conflict of interest management policy at each site. All remaining  
22 authors have declared no conflicts of interest.  
23  
24  
25  
26  
27  
28  
29  
30  
31  
32  
33  
34  
35  
36  
37

### 38 **Data statement**

39 The study protocol, a model informed consent form, and the checklist based on the SPIRIT guidelines  
40 were attached as supplements.  
41  
42  
43  
44  
45  
46  
47  
48  
49  
50  
51  
52  
53  
54  
55  
56  
57  
58  
59  
60

## Figure legends

### Figure 1. Design of REBRAnD study

The study consists of the screening period (8 weeks), double-blind phase (37 weeks), and extension phase (13 weeks). The double-blind phase for evaluating the efficacy and safety is composed of the low-dose maintenance period (up to 10 mg/day), high-dose maintenance period (up to 22.5 mg/day), and tapering period of the trial drug. Additionally, there is an open-labelled active drug extension period (up to 10 or 22.5 mg/day) for evaluating long-term safety.

For peer review only

Table 1. Trial schedule

| Timing                              |                                   | Screening period  |                                 | Double-blind phase         |                             |        |        |        |        |         |         |         |                             |         |         |         |         |         |         |         |
|-------------------------------------|-----------------------------------|-------------------|---------------------------------|----------------------------|-----------------------------|--------|--------|--------|--------|---------|---------|---------|-----------------------------|---------|---------|---------|---------|---------|---------|---------|
|                                     |                                   | Before enrollment | Before start of trial treatment | At start of administration | Escalation to 4 tablets/day |        |        |        |        |         |         |         | Escalation to 9 tablets/day |         |         |         |         |         | Taper   |         |
|                                     |                                   |                   |                                 |                            | Week 1                      | Week 2 | Week 3 | Week 4 | Week 8 | Week 12 | Week 16 | Week 20 | Week 21                     | Week 22 | Week 23 | Week 24 | Week 28 | Week 32 | Week 36 | Week 37 |
| Visit/medical examination           |                                   | ○                 | ○                               | ○                          | ○                           | Phone  | Phone  | ○      | ○      | ○       | ○       | ○       | ○                           | Phone   | Phone   | ○       | ○       | ○       | ○       | ○       |
| Informed consent                    |                                   | ○                 |                                 |                            |                             |        |        |        |        |         |         |         |                             |         |         |         |         |         |         |         |
| Neuropsychological/Motor assessment | ADAS-J cog                        | ○                 |                                 |                            |                             |        |        |        |        |         |         |         |                             |         |         |         |         |         |         |         |
|                                     | SIB-J                             |                   | ○                               | ○                          |                             |        |        |        |        |         |         | ○       |                             |         |         |         |         |         |         | ○       |
|                                     | NPI                               |                   | ○                               | ○                          |                             |        | ○      | ○      | ○      | ○       | ○       | ○       |                             |         |         | ○       | ○       | ○       | ○       | ○       |
|                                     | MENFIS                            |                   | ○                               | ○                          |                             |        | ○      | ○      | ○      | ○       | ○       | ○       |                             |         |         | ○       | ○       | ○       | ○       | ○       |
|                                     | MMSE-J                            | ○                 | ○                               | ○                          |                             |        |        |        |        |         |         | ○       |                             |         |         |         |         |         |         | ○       |
|                                     | DAD                               |                   | ○                               | ○                          |                             |        |        |        |        |         |         | ○       |                             |         |         |         |         |         |         | ○       |
|                                     | UPDRS part III                    |                   | ○                               | ○                          |                             |        |        |        |        |         |         | ○       |                             |         |         |         |         |         |         | ○       |
|                                     | Apathy Scale                      |                   | ○                               | ○                          |                             |        |        |        |        |         |         | ○       |                             |         |         |         |         |         |         | ○       |
|                                     | UMNB                              |                   | ○                               | ○                          |                             |        |        |        |        |         |         | ○       |                             |         |         |         |         |         |         | ○       |
| Laboratory biomarkers               | Plasma biomarkers                 |                   | ○                               | ○                          |                             |        |        |        |        | ○       |         | ○       |                             |         |         |         | ○       |         | ○       | ○       |
|                                     | CSF biomarkers                    |                   |                                 | ○                          |                             |        |        |        |        |         |         |         |                             |         |         |         |         |         |         | ○       |
| Digital biomarkers                  | Wearable physical activity        |                   | →                               | →                          | →                           | →      | →      | →      | →      | →       | →       | →       | →                           | →       | →       | →       | →       | →       | →       | →       |
|                                     | Finger tapping                    |                   | ○                               | ○                          |                             |        | ○      | ○      | ○      | ○       | ○       | ○       |                             |         |         | ○       | ○       | ○       | ○       | ○       |
| PET                                 | Brain amyloid PET                 |                   | ○                               |                            |                             |        |        |        |        |         |         |         |                             |         |         |         |         |         |         | ○       |
|                                     | Brain tau PET                     |                   | ○                               |                            |                             |        |        |        |        |         |         |         |                             |         |         |         |         |         |         | ○       |
| Safety assessment                   | Cardiac ultrasound                | ○                 |                                 |                            |                             |        |        |        |        |         |         | ○       |                             |         |         |         |         |         |         | ○       |
|                                     | Chest X-ray                       | ○                 |                                 |                            |                             |        | ○      |        |        |         |         | ○       |                             |         |         | ○       |         |         |         | ○       |
|                                     | ECG                               | ○                 |                                 |                            | ▲                           |        | ○      | ▲      | ▲      | ▲       | ○       | ▲       |                             |         | ○       | ▲       | ▲       | ○       | ○       | ▲       |
|                                     | Head MRI                          | ○                 |                                 |                            |                             |        |        |        |        |         |         |         |                             |         |         |         |         |         |         | ○       |
|                                     | Blood bromocriptine concentration |                   |                                 | ○*                         |                             |        |        |        |        | ○       | ○       | ○       |                             |         |         |         | ○       | ○       | ○       | ○       |
|                                     | Laboratory tests                  | ○                 |                                 |                            |                             |        | ○      |        |        |         |         | ○       |                             |         |         | ○       |         |         |         | ○       |
| AEs                                 |                                   |                   | →                               | →                          | →                           | →      | →      | →      | →      | →       | →       | →       | →                           | →       | →       | →       | →       | →       | →       | →       |

|                                            |                                          | Extension phase                 |         |         |         |         |         |         |         |         |         | End of trial |
|--------------------------------------------|------------------------------------------|---------------------------------|---------|---------|---------|---------|---------|---------|---------|---------|---------|--------------|
|                                            |                                          | Escalation to 4–9 tablets/day † |         |         |         |         |         |         |         |         |         |              |
| Timing                                     |                                          | Week 37                         | Week 38 | Week 39 | Week 40 | Week 41 | Week 42 | Week 43 | Week 44 | Week 45 | Week 48 | Week 50      |
| <b>Visit/medical examination</b>           |                                          | ○                               | Phone   | Phone   | ○       | Phone   | Phone   | Phone   | ○       | Phone   | ○       | ○            |
| <b>Informed consent</b>                    |                                          |                                 |         |         |         |         |         |         |         |         |         |              |
| <b>Neuropsychological/motor assessment</b> | <b>ADAS-J cog</b>                        |                                 |         |         |         |         |         |         |         |         |         |              |
|                                            | <b>SIB-J</b>                             |                                 |         |         |         |         |         |         |         |         |         |              |
|                                            | <b>NPI</b>                               |                                 |         |         |         |         |         |         |         |         |         |              |
|                                            | <b>MENFIS</b>                            |                                 |         |         |         |         |         |         |         |         |         |              |
|                                            | <b>MMSE-J</b>                            |                                 |         |         |         |         |         |         |         |         |         |              |
|                                            | <b>DAD</b>                               |                                 |         |         |         |         |         |         |         |         |         |              |
|                                            | <b>UPDRS part III</b>                    |                                 |         |         |         |         |         |         |         |         |         |              |
|                                            | <b>Apathy Scale</b>                      |                                 |         |         |         |         |         |         |         |         |         |              |
| <b>Laboratory biomarkers</b>               | <b>Plasma biomarkers</b>                 |                                 |         |         |         |         |         |         |         |         |         |              |
|                                            | <b>CSF biomarkers</b>                    |                                 |         |         |         |         |         |         |         |         |         |              |
| <b>Digital biomarkers</b>                  | <b>Wearable physical activity</b>        |                                 |         |         |         |         |         |         |         |         |         |              |
|                                            | <b>Finger tapping</b>                    |                                 |         |         |         |         |         |         |         |         |         |              |
| <b>PET</b>                                 | <b>Brain amyloid PET</b>                 |                                 |         |         |         |         |         |         |         |         |         |              |
|                                            | <b>Brain tau PET</b>                     |                                 |         |         |         |         |         |         |         |         |         |              |
| <b>Safety assessment</b>                   | <b>Cardiac ultrasound</b>                |                                 |         |         |         |         |         |         |         |         |         | ○            |
|                                            | <b>Chest X-ray</b>                       |                                 |         |         |         |         |         |         |         |         |         | ○            |
|                                            | <b>ECG</b>                               | ▲                               |         |         | ▲       |         |         |         | ▲       |         | ▲       | ○            |
|                                            | <b>Head MRI</b>                          |                                 |         |         |         |         |         |         |         |         |         |              |
|                                            | <b>Blood bromocriptine concentration</b> |                                 |         |         |         |         |         |         |         |         |         |              |
|                                            | <b>Laboratory tests</b>                  |                                 |         |         | ○       |         |         |         |         |         |         | ○            |
| <b>AEs</b>                                 |                                          | →                               | →       | →       | →       | →       | →       | →       | →       | →       | →       | →            |

1  
2  
3  
4  
5  
6  
7  
8  
9  
10  
11  
12  
13  
14  
15  
16  
17  
18  
19  
20  
21  
22  
23  
24  
25  
26  
27  
28  
29  
30  
31  
32  
33  
34  
35  
36  
37  
38  
39  
40  
41  
42  
43  
44  
45  
46

○: To be performed

▲: To be performed if donepezil hydrochloride is co-administered.

• After the final visit of the last participant at Week 37, the blind will be broken following data lock to start analyses.

\*Schedule for measuring blood bromocriptine concentration on Day 1

| Time after first administration of trial drug (h) | Before administration | 1           | 2           | 3           | 4           | 6           |
|---------------------------------------------------|-----------------------|-------------|-------------|-------------|-------------|-------------|
| Time window (in principle)                        | -2 hours              | ± 5 minutes |
| Plasma bromocriptine                              | ○                     | ○           | ○           | ○           | ○           | ○           |

† Standard dose is 4 tablets/day, up to 9 tablets/day at maximum.

ADAS-J cog, Alzheimer's Disease Assessment Scale-cognitive subscale Japanese version; AEs, adverse events; DAD, Disability Assessment for Dementia; MENFIS, Mental Function Impairment Scale; MMSE-J, Mini Mental State Examination-Japanese; NPI, Neuropsychiatric Inventory; SIB-J, Severe Impairment Battery-Japanese; UMNb, Upper Motor Neuron Burden Score; UPDRS part III, Movement Disorder Society-sponsored revision of the Unified Parkinson's Disease Rating Scale Part III.

**Box 1****ELIGIBILITY CRITERIA**

Patients who meet all the following inclusion criteria and do not meet any of the exclusion criteria will be enrolled as eligible participants.

Inclusion criteria

- 1) Alzheimer's disease patients with PSEN1 mutations
- 2) Patients diagnosed with "probable AD" according to the diagnostic guideline of NIA-AA or "probable Alzheimer-type dementia" according to the diagnostic criteria for Alzheimer's disease specified in DSM-5
- 3) An MMSE-J score of  $\leq 25$
- 4) Patients whose cognitive function and every-day function are obviously impaired based on their medical record or information provided by a person well-acquainted with the patient
- 5) Patients for whom intellectual disability and mental disorders other than dementia can be ruled out based on their academic background, work history, and life history
- 6) Patients with a reliable and close relationship with a partner/caregiver
- 7) Age  $\geq 20$  years at the time of providing informed consent
- 8) Written informed consent has been obtained from the patient or his/her legally acceptable representative to participate in this trial

Exclusion criteria

- 1) Difficulty with the oral intake of tablets
- 2) Patients receiving anti-dementia drugs who have changed the dosing regimen during the 2 months prior to providing informed consent
- 3) Patients with dementia due to a pathology other than AD (e.g., vascular dementia, FTD, Lewy body dementia, progressive supranuclear palsy, corticobasal degeneration, Huntington's disease, prion disease)
- 4) Presence of clinically relevant or unstable mental disorders. Patients with major depression in remission can be enrolled
- 5) Imminent risk of self-harm or harm to others
- 6) Body mass index of  $\leq 17$  or  $\geq 35$
- 7) Patients with a history of alcohol dependence, drug dependence, or drug abuse within 5 years before providing informed consent
- 8) HBs antigen positive
- 9) Anti-HIV antibody positive
- 10) Anti-HTLV-1 antibody positive
- 11) Patients with an active infection such as hepatitis C and syphilis (STS/TPHA)
- 12) Patients with the following liver function values by testing before enrolment

- AST (GOT) > 4.0 × Upper limit of institutional reference range or
  - ALT (GPT) > 4.0 × Upper limit of institutional reference range
- 13) Patients with uncontrolled, clinically significant medical conditions (e.g., diabetes mellitus, hypertension, thyroid/endocrine disease, congestive cardiac failure, angina pectoris, cardiac/gastrointestinal disease, dialysis, and abnormal renal function with an estimated CLcr < 30 mL/min) within 3 months prior to providing informed consent in addition to the underlying disease to be investigated in the trial and for whom the investigator or sub-investigator considers that there is a significant medical risk in the patient's participation in the trial
  - 14) Patients with long QT syndrome or tendency toward prolonged QTc interval (male: ≥ 470 msec, female: ≥ 480 msec), or patients with a history/complication of torsades de pointes
  - 15) Patients with a history of malignancies within 5 years prior to providing informed consent  
However, patients with the following diseases can be enrolled if they are treated appropriately:
    - a. Skin cancer (basal cell, squamous cell)
    - b. Cervical carcinoma in situ
    - c. Localised prostate cancer
    - d. Malignancies that have not recurred for at least 3 years since surgery and the patient's physician has determined that the risk of recurrence is low
  - 16) Patients with clinically significant vitamin B1/B12 deficiency or folic acid deficiency within 6 months prior to providing informed consent
  - 17) Patients who participated in other clinical research/trials involving interventions within 3 months prior to providing informed consent
  - 18) Patients who previously received bromocriptine or TW-012R
  - 19) Patients with a history of hypersensitivity to bromocriptine or ergot alkaloids
  - 20) Patients with current or a history of thickened heart valve cusps, restricted heart valve motion, and associated heart valve lesions, such as stenosis, confirmed by echocardiography
  - 21) Pregnant females, lactating females, and females who may be pregnant (pregnancy test will be performed to confirm this status), and females who wish to become pregnant
  - 22) Other patients who are considered inappropriate for participating in this trial at the discretion of the investigator or sub-investigator

\* CYP3A4 inhibitors/inducers and dopamine antagonists are contraindicated during the trial period except for domperidone and quetiapine in emergent settings.

## References

- 1 Alzheimer's Disease International. 2019. World Alzheimer Report 2019: Attitudes to dementia. London: Alzheimer's Disease International.
- 2 Cummings J, Lee G, Ritter A, et al. Alzheimer's disease drug development pipeline: 2020. *Alzheimers Dement (N Y)* 2020;65:e12050.
- 3 Ryan NS, Nicholas JM, Weston PSJ, et al. Clinical phenotype and genetic associations in autosomal dominant familial Alzheimer's disease: a case series. *Lancet Neurol* 2016;15:1326–35.
- 4 Larner AJ, Doran M. Clinical phenotypic heterogeneity of Alzheimer's disease associated with mutations of the presenilin-1 gene. *J Neurol* 2006;253:139–58.
- 5 Duff K, Eckman C, Zehr C, et al. Increased amyloid-beta42(43) in brains of mice expressing mutant presenilin 1. *Nature* 1996;383:710–13.
- 6 Borchelt DR, Thinakaran G, Eckman CB, et al. Familial Alzheimer's disease-linked presenilin 1 variants elevate Abeta1-42/1-40 ratio in vitro and in vivo. *Neuron* 1996;17:1005–13.
- 7 Hardy J, Selkoe DJ. The amyloid hypothesis of Alzheimer's disease: progress and problems on the road to therapeutics. *Science* 2002;297:353–56.
- 8 Bentahir M, Nyabi O, Verhamme J, et al. Presenilin clinical mutations can affect gamma-secretase activity by different mechanisms. *J Neurochem* 2006;96:732–42.
- 9 Strooper BD, Iwatsubo T, Wolfe MS, et al. Presenilins and  $\gamma$ -secretase: structure, function, and role in Alzheimer Disease. *Cold Spring Harb Perspect Med* 2012;2:a006304.
- 10 Kondo T, Imamura K, Funayama M, et al. iPSC-Based Compound Screening and In Vitro Trials Identify a Synergistic Anti-amyloid  $\beta$  Combination for Alzheimer's Disease. *Cell Rep* 2017;21:2304–12.
- 11 WIPO PCT/JP2016/089217 <http://ips-cell.net/e/patent/docs/AJ139.pdf> (accessed on 25th July, 2020)
- 12 United States Patent Application Publication, INOUE et al. US20190008860A1 <https://patents.google.com/patent/US20190008860A1/en?q=KONDO+Inoue+Bromocriptine+alzheimer&oq=KONDO+Inoue+Bromocriptine+alzheimer> (accessed on 25th July, 2020)
- 13 Interview Form bromocriptine Tablets 2.5 mg "Towa," Towa Pharmaceutical Co., Ltd. <https://med.towayakuhin.co.jp/medical/product/product.php?id=T001706201703011557043R> (accessed on 24th July, 2020)
- 14 McKhann GM, Knopman DS, Chertkow H, et al. The diagnosis of dementia due to Alzheimer's disease: Recommendations from the National Institute on Aging-



- 1  
2  
3  
4 Alzheimer's Association workgroups on diagnostic guidelines for Alzheimer's disease.  
5 *Alzheimer's Dement* 2011;7:263–9.
- 6  
7 15 American Psychiatric Association. Diagnostic and Statistical Manual of Mental Disorders,  
8 Fifth Edition: DSM-5. Washington, DC: American Psychiatric Publishing 2013: 611–14.
- 9  
10 16 Tokuchi R, Hishikawa N, Kurata T, et al. Clinical and demographic predictors of mild  
11 cognitive impairment for converting to Alzheimer's disease and reverting to normal  
12 cognition. *J Neurol Sci* 2014;346:288-92.
- 13  
14 17 Japanese Familial Alzheimer's Disease (JFAD) database. <http://www.alzdb.org/jfad/>  
15 (accessed on 24<sup>th</sup> July, 2020)
- 16  
17 18 FY 2013 Subsidy for Geriatric Health Promotion, Project for Geriatric Health  
18 Enhancement: Report of Research Project on the Support System for Individuals With  
19 Familial Alzheimer's Disease and Their Families. 2013.
- 20  
21 19 Shea YF, Chu LW, Chan AO, et al. A systematic review of familial Alzheimer's disease:  
22 Differences in presentation of clinical features among three mutated genes and potential  
23 ethnic differences *J Formos Med Assoc* 2016;115:67–75.
- 24  
25 20 Ryan NS, Nicholas JM, Weston PSJ, et al. Clinical phenotype and genetic associations in  
26 autosomal dominant familial Alzheimer's disease: a case series. *Lancet Neurol*  
27 2016;15:1326–35.
- 28  
29 21 Tang M, Ryman DC, McDade E, et al. Neurological manifestations of autosomal  
30 dominant familial Alzheimer's disease: a comparison of the published literature with the  
31 Dominantly Inherited Alzheimer Network observational study (DIAN-OBS). *Lancet*  
32 *Neurol* 2016;15:1317–25
- 33  
34 22 Interview Form Parlodel Tablets 2.5 mg, Sun Pharma Japan Ltd. [https://medical.mt-](https://medical.mt-pharma.co.jp/di/file/dc/plo.pdf)  
35 [pharma.co.jp/di/file/dc/plo.pdf](https://medical.mt-pharma.co.jp/di/file/dc/plo.pdf) (accessed on 1st March, 2021)
- 36  
37 23 Saxton J, McGonigle-Gibson KL, Swihart AA, et al. Assessment of the severely impaired  
38 patient: Description and validation of a new neuropsychological test battery. *Psychol*  
39 *Assessment* 1990;2:298–303.
- 40  
41 24 Saxton J, McGonigle K, Swihart A, et al. Severe Impairment Battery (SIB). London, UK.  
42 Pearson Assessment 1993.
- 43  
44 25 Niina R, Homma A, Sugai Y, et al. Reliability, validity and clinical availability of a  
45 Japanese version of Severe Impairment Battery (SIB) and a Japanese version of modified  
46 Alzheimer's Disease Cooperative Study-Activities of Daily Living Inventory (ADCS-  
47 ADL). *Jpn J Geriatr Psychiatry* 2005;16:683–691.
- 48  
49 26 Cummings JL, Mega M, Gray K, et al. The Neuropsychiatric Inventory. Comprehensive  
50 assessment of psychopathology in dementia. *Neurology* 1994;44:2308–14.
- 51  
52 27 Cummings JL. The Neuropsychiatric Inventory. Assessing psychopathology in dementia  
53 patients. *Neurology* 1997;48:10S–16S.
- 54  
55  
56  
57  
58  
59  
60

- 1  
2  
3  
4 28 Hirono N, Mori E, Ikejiri Y, et al. Japanese version of the neuropsychiatric inventory a  
5 scoring system for neuropsychiatric disturbances in dementia patients. *No To Shinkei*  
6 1997;49:266–71.  
7  
8 29 Homma A, Niina R, Ishii T, et al. Development of a new rating scale for dementia in the  
9 elderly: Mental Function Impairment Scale (MENFIS) (in Japanese). *Jpn J Geriatr*  
10 *Psychiatry* 1991;2:1217–22.  
11  
12 30 Folstein MF, Folstein SE, McHugh PR. “Mini-mental state”: A practical method for  
13 grading the cognitive state of patients for the clinician. *J Psychiatr Res* 1975;12:189–98.  
14  
15 31 Sugishita M, Hemmi I, Takeuchi T. Reexamination of the Validity and Reliability of the  
16 Japanese Version of the Mini-Mental State Examination (MMSE-J). *Japanese Journal of*  
17 *Cognitive Neuroscience* 2016;18:168–83.  
18  
19 32 Sugishita M, Koshizuka Y, Sudou S, et al. The validity and reliability of the Japanese  
20 version of the Mini- Mental State Examination(MMSE-J) with the original procedure of  
21 the attention and calculation task(2001). *Japanese Journal of Cognitive Neuroscience*  
22 2018;20:91–110.  
23  
24 33 Galasko D, Bennett D, Sano M, et al. An inventory to assess activities of daily living for  
25 clinical trials in Alzheimer's disease. The Alzheimer's Disease Cooperative Study.  
26 *Alzheimer Dis Assoc Disord* 2002;11 Suppl 2:S33–39.  
27  
28 34 Goetz CG, Tilley BC, Shaftman SR, et al. Movement Disorder Society-sponsored revision  
29 of the Unified Parkinson's Disease Rating Scale (MDS-UPDRS): scale presentation and  
30 clinimetric testing results. *Mov Disord* 2007;23:2129–70.  
31  
32 35 Marin RS, Biedrzycki RC, Firinciogullari S. Reliability and validity of the apathy  
33 evaluation scale. *Psychiat Res* 1991;38:143–62.  
34  
35 36 Kasai M, Meguro K and Nakamura K. Reliability and validity of the Japanese version of  
36 the Apathy Evaluation Scale. *Nippon Ronen Igakkai Zasshi* 2014;51:445–52.  
37  
38 37 Palmqvist S, Janelidze S, Stomrud E, et al. Performance of Fully Automated Plasma  
39 Assays as Screening Tests for Alzheimer Disease–Related  $\beta$ -Amyloid Status. *JAMA*  
40 *Neurol* 2019;76:1060–69.  
41  
42 38 Schultz SA, Strain JF, Adedokun A, et al. Serum neurofilament light chain levels are  
43 associated with white matter integrity in autosomal dominant Alzheimer's disease.  
44 *Neurobiol Dis* 2020;142:104960.  
45  
46 39 Mielke MM, Hagen CE, Wennberg AMV, et al. Association of Plasma Total Tau Level  
47 With Cognitive Decline and Risk of Mild Cognitive Impairment or Dementia in the Mayo  
48 Clinic Study on Aging. *JAMA Neurol* 2017;74:1073–80.  
49  
50 40 Karikari TK, Pascoal TA, Ashton NJ, et al. Blood phosphorylated tau 181 as a biomarker  
51 for Alzheimer's disease: a diagnostic performance and prediction modelling study using  
52 data from four prospective cohorts. *Lancet Neurol* 2020;19:422–33.  
53  
54  
55  
56  
57  
58  
59  
60

- 1  
2  
3  
4 41 Tatebe H, Kasai T, Ohmichi T, et al. Quantification of plasma phosphorylated tau to use  
5 as a biomarker for brain Alzheimer pathology: pilot case-control studies including  
6 patients with Alzheimer's disease and down syndrome. *Mol Neurodegener* 2017;12:63.  
7  
8 42 Bateman RJ, Xiong C, Benzinger TLS, et al. Clinical and Biomarker Changes in  
9 Dominantly Inherited Alzheimer's Disease. *N Engl J Med* 2012;367:795–804.  
10  
11 43 Dubois B, Feldman HH, Jacova C, et al. Advancing research diagnostic criteria for  
12 Alzheimer's disease: the IWG-2 criteria. *Lancet Neurol* 2014;13:614–29.  
13  
14 44 Scheinin NM, Tolvanen TK, Wilson IA, et al. Biodistribution and radiation dosimetry of  
15 the amyloid imaging agent 11C-PIB in humans. *J Nucl Med* 2007;48:128–33.  
16  
17 45 Koole M, Lohith TG, Valentine JL, et al. Preclinical Safety Evaluation and Human  
18 Dosimetry of [18F]MK-6240, a Novel PET Tracer for Imaging Neurofibrillary Tangles.  
19 *Mol Imaging Biol* 2020;22:173–80.  
20  
21 46 Brettschneider J, Toledo JB, Van Deerlin VM, et al. Microglial Activation Correlates with  
22 Disease Progression and Upper Motor Neuron Clinical Symptoms in Amyotrophic Lateral  
23 Sclerosis. *PLoS One* 2012;7:e39216.  
24  
25 47 Nakamura A, Kaneko N, Villemagne VL, et al. High performance plasma amyloid- $\beta$   
26 biomarkers for Alzheimer's disease. *Nature* 2018;554:249–54.  
27  
28 48 Watanabe M, Nakamura Y, Yoshiyama Y, et al. Analyses of natural courses of Japanese  
29 patients with Alzheimer's disease using placebo data from placebo-controlled, randomized  
30 clinical trials: Japanese Study on the Estimation of Clinical course of Alzheimer's disease.  
31 *Alzheimers Dement (N Y)* 2019;5:398-408.  
32  
33 49 Noguchi-Shinohara M, Ono K, Hamaguchi T, et al. Safety and efficacy of Melissa  
34 officinalis extract containing rosmarinic acid in the prevention of Alzheimer's disease  
35 progression. *Sci Rep* 2020;10:18627.  
36  
37 50 Satir TM, Agholme L, Karlsson A, et al. Partial reduction of amyloid  $\beta$  production by  $\beta$ -  
38 secretase inhibitors does not decrease synaptic transmission. *Alzheimers Res Ther*  
39 2020;12:63.  
40  
41 51 Weinberg MS, Patrick RE, Schwab NA, et al. Clinical Trials and Tribulations in the  
42 COVID-19 Era. *Am J Geriatr Psychiatry* 2020;28:913–20.  
43  
44  
45  
46  
47  
48  
49  
50  
51  
52  
53  
54  
55  
56  
57  
58  
59  
60

Figure 1

Kondo et al.



Figure 1. Design of REBRaND study

The study consists of the screening period (8 weeks), double-blind phase (37 weeks), and extension phase (13 weeks). The double-blind phase for evaluating the efficacy and safety is composed of the low-dose maintenance period (up to 10 mg/day), high-dose maintenance period (up to 22.5 mg/day), and tapering period of the trial drug. Additionally, there is an open-labelled active drug extension period (up to 10 or 22.5 mg/day) for evaluating long-term safety.



STANDARD PROTOCOL ITEMS: RECOMMENDATIONS FOR INTERVENTIONAL TRIALS

SPIRIT 2013 Checklist: Recommended items to address in a clinical trial protocol and related documents\*

| Section/item                      | Item No | Description                                                                                                                                                                                                                                                                              | Addressed on page number |
|-----------------------------------|---------|------------------------------------------------------------------------------------------------------------------------------------------------------------------------------------------------------------------------------------------------------------------------------------------|--------------------------|
| <b>Administrative information</b> |         |                                                                                                                                                                                                                                                                                          |                          |
| Title                             | 1       | Descriptive title identifying the study design, population, interventions, and, if applicable, trial acronym                                                                                                                                                                             | <u>1</u>                 |
| Trial registration                | 2a      | Trial identifier and registry name. If not yet registered, name of intended registry                                                                                                                                                                                                     | <u>3</u>                 |
|                                   | 2b      | All items from the World Health Organization Trial Registration Data Set                                                                                                                                                                                                                 | <u>6-10, Table 1</u>     |
| Protocol version                  | 3       | Date and version identifier                                                                                                                                                                                                                                                              | <u>Suppl (protocol)</u>  |
| Funding                           | 4       | Sources and types of financial, material, and other support                                                                                                                                                                                                                              | <u>15</u>                |
| Roles and responsibilities        | 5a      | Names, affiliations, and roles of protocol contributors                                                                                                                                                                                                                                  | <u>1,14</u>              |
|                                   | 5b      | Name and contact information for the trial sponsor                                                                                                                                                                                                                                       | <u>1,15</u>              |
|                                   | 5c      | Role of study sponsor and funders, if any, in study design; collection, management, analysis, and interpretation of data; writing of the report; and the decision to submit the report for publication, including whether they will have ultimate authority over any of these activities | <u>16,17</u>             |
|                                   | 5d      | Composition, roles, and responsibilities of the coordinating centre, steering committee, endpoint adjudication committee, data management team, and other individuals or groups overseeing the trial, if applicable (see Item 21a for data monitoring committee)                         | <u>11</u>                |

1 **Introduction**

2

3 Background and rationale 6a Description of research question and justification for undertaking the trial, including summary of relevant studies (published and unpublished) examining benefits and harms for each intervention 5, 6

4

5

6 6b Explanation for choice of comparators 6

7

8 Objectives 7 Specific objectives or hypotheses 6

9

10 Trial design 8 Description of trial design including type of trial (eg, parallel group, crossover, factorial, single group), allocation ratio, and framework (eg, superiority, equivalence, noninferiority, exploratory) 6

11

12

13

14 **Methods: Participants, interventions, and outcomes**

15

16 Study setting 9 Description of study settings (eg, community clinic, academic hospital) and list of countries where data will be collected. Reference to where list of study sites can be obtained 1, 3, 8

17

18

19 Eligibility criteria 10 Inclusion and exclusion criteria for participants. If applicable, eligibility criteria for study centres and individuals who will perform the interventions (eg, surgeons, psychotherapists) 6, 22, 23

20

21

22 Interventions 11a Interventions for each group with sufficient detail to allow replication, including how and when they will be administered 7, 8, Table 1

23

24

25 11b Criteria for discontinuing or modifying allocated interventions for a given trial participant (eg, drug dose change in response to harms, participant request, or improving/worsening disease) 8

26

27

28 11c Strategies to improve adherence to intervention protocols, and any procedures for monitoring adherence (eg, drug tablet return, laboratory tests) 7, 8

29

30

31 11d Relevant concomitant care and interventions that are permitted or prohibited during the trial 6, 8

32

33

34 Outcomes 12 Primary, secondary, and other outcomes, including the specific measurement variable (eg, systolic blood pressure), analysis metric (eg, change from baseline, final value, time to event), method of aggregation (eg, median, proportion), and time point for each outcome. Explanation of the clinical relevance of chosen efficacy and harm outcomes is strongly recommended 9, 10, Table 1

35

36

37

38

39

40 Participant timeline 13 Time schedule of enrolment, interventions (including any run-ins and washouts), assessments, and visits for participants. A schematic diagram is highly recommended (see Figure) Figure 1, Table 1

41

42

43

44

45

46

1 Sample size 14 Estimated number of participants needed to achieve study objectives and how it was determined, including 7  
 2 clinical and statistical assumptions supporting any sample size calculations

3  
 4 Recruitment 15 Strategies for achieving adequate participant enrolment to reach target sample size 6, 7  
 5

6 **Methods: Assignment of interventions (for controlled trials)**  
 7

8 Allocation:  
 9

10 Sequence 16a Method of generating the allocation sequence (eg, computer-generated random numbers), and list of any 9  
 11 generation factors for stratification. To reduce predictability of a random sequence, details of any planned restriction  
 12 (eg, blocking) should be provided in a separate document that is unavailable to those who enrol participants  
 13 or assign interventions  
 14

15  
 16 Allocation 16b Mechanism of implementing the allocation sequence (eg, central telephone; sequentially numbered, 9  
 17 concealment opaque, sealed envelopes), describing any steps to conceal the sequence until interventions are assigned  
 18 mechanism  
 19

20 Implementation 16c Who will generate the allocation sequence, who will enrol participants, and who will assign participants to 9  
 21 interventions  
 22

23  
 24 Blinding (masking) 17a Who will be blinded after assignment to interventions (eg, trial participants, care providers, outcome 9  
 25 assessors, data analysts), and how  
 26

27 17b If blinded, circumstances under which unblinding is permissible, and procedure for revealing a participant's 9  
 28 allocated intervention during the trial  
 29  
 30

31 **Methods: Data collection, management, and analysis**  
 32

33 Data collection 18a Plans for assessment and collection of outcome, baseline, and other trial data, including any related 9, 10, Table 1  
 34 methods processes to promote data quality (eg, duplicate measurements, training of assessors) and a description of  
 35 study instruments (eg, questionnaires, laboratory tests) along with their reliability and validity, if known.  
 36 Reference to where data collection forms can be found, if not in the protocol  
 37

38  
 39 18b Plans to promote participant retention and complete follow-up, including list of any outcome data to be 7, 8  
 40 collected for participants who discontinue or deviate from intervention protocols  
 41

|    |                                 |     |                                                                                                                                                                                                                                                                                                                                       |                   |
|----|---------------------------------|-----|---------------------------------------------------------------------------------------------------------------------------------------------------------------------------------------------------------------------------------------------------------------------------------------------------------------------------------------|-------------------|
| 1  | Data management                 | 19  | Plans for data entry, coding, security, and storage, including any related processes to promote data quality (eg, double data entry; range checks for data values). Reference to where details of data management procedures can be found, if not in the protocol                                                                     | <u>11</u>         |
| 2  |                                 |     |                                                                                                                                                                                                                                                                                                                                       |                   |
| 3  |                                 |     |                                                                                                                                                                                                                                                                                                                                       |                   |
| 4  |                                 |     |                                                                                                                                                                                                                                                                                                                                       |                   |
| 5  | Statistical methods             | 20a | Statistical methods for analysing primary and secondary outcomes. Reference to where other details of the statistical analysis plan can be found, if not in the protocol                                                                                                                                                              | <u>11</u>         |
| 6  |                                 |     |                                                                                                                                                                                                                                                                                                                                       |                   |
| 7  |                                 |     |                                                                                                                                                                                                                                                                                                                                       |                   |
| 8  |                                 | 20b | Methods for any additional analyses (eg, subgroup and adjusted analyses)                                                                                                                                                                                                                                                              | <u>11</u>         |
| 9  |                                 |     |                                                                                                                                                                                                                                                                                                                                       |                   |
| 10 |                                 | 20c | Definition of analysis population relating to protocol non-adherence (eg, as randomised analysis), and any statistical methods to handle missing data (eg, multiple imputation)                                                                                                                                                       | <u>11</u>         |
| 11 |                                 |     |                                                                                                                                                                                                                                                                                                                                       |                   |
| 12 |                                 |     |                                                                                                                                                                                                                                                                                                                                       |                   |
| 13 |                                 |     |                                                                                                                                                                                                                                                                                                                                       |                   |
| 14 | <b>Methods: Monitoring</b>      |     |                                                                                                                                                                                                                                                                                                                                       |                   |
| 15 |                                 |     |                                                                                                                                                                                                                                                                                                                                       |                   |
| 16 | Data monitoring                 | 21a | Composition of data monitoring committee (DMC); summary of its role and reporting structure; statement of whether it is independent from the sponsor and competing interests; and reference to where further details about its charter can be found, if not in the protocol. Alternatively, an explanation of why a DMC is not needed | <u>11</u>         |
| 17 |                                 |     |                                                                                                                                                                                                                                                                                                                                       |                   |
| 18 |                                 |     |                                                                                                                                                                                                                                                                                                                                       |                   |
| 19 |                                 |     |                                                                                                                                                                                                                                                                                                                                       |                   |
| 20 |                                 |     |                                                                                                                                                                                                                                                                                                                                       |                   |
| 21 |                                 |     |                                                                                                                                                                                                                                                                                                                                       |                   |
| 22 |                                 | 21b | Description of any interim analyses and stopping guidelines, including who will have access to these interim results and make the final decision to terminate the trial                                                                                                                                                               | <u>N/A</u>        |
| 23 |                                 |     |                                                                                                                                                                                                                                                                                                                                       |                   |
| 24 |                                 |     |                                                                                                                                                                                                                                                                                                                                       |                   |
| 25 | Harms                           | 22  | Plans for collecting, assessing, reporting, and managing solicited and spontaneously reported adverse events and other unintended effects of trial interventions or trial conduct                                                                                                                                                     | <u>9, Table 1</u> |
| 26 |                                 |     |                                                                                                                                                                                                                                                                                                                                       |                   |
| 27 |                                 |     |                                                                                                                                                                                                                                                                                                                                       |                   |
| 28 | Auditing                        | 23  | Frequency and procedures for auditing trial conduct, if any, and whether the process will be independent from investigators and the sponsor                                                                                                                                                                                           | <u>11</u>         |
| 29 |                                 |     |                                                                                                                                                                                                                                                                                                                                       |                   |
| 30 |                                 |     |                                                                                                                                                                                                                                                                                                                                       |                   |
| 31 |                                 |     |                                                                                                                                                                                                                                                                                                                                       |                   |
| 32 | <b>Ethics and dissemination</b> |     |                                                                                                                                                                                                                                                                                                                                       |                   |
| 33 |                                 |     |                                                                                                                                                                                                                                                                                                                                       |                   |
| 34 | Research ethics approval        | 24  | Plans for seeking research ethics committee/institutional review board (REC/IRB) approval                                                                                                                                                                                                                                             | <u>12</u>         |
| 35 |                                 |     |                                                                                                                                                                                                                                                                                                                                       |                   |
| 36 |                                 |     |                                                                                                                                                                                                                                                                                                                                       |                   |
| 37 | Protocol amendments             | 25  | Plans for communicating important protocol modifications (eg, changes to eligibility criteria, outcomes, analyses) to relevant parties (eg, investigators, REC/IRBs, trial participants, trial registries, journals, regulators)                                                                                                      | <u>12</u>         |
| 38 |                                 |     |                                                                                                                                                                                                                                                                                                                                       |                   |
| 39 |                                 |     |                                                                                                                                                                                                                                                                                                                                       |                   |
| 40 |                                 |     |                                                                                                                                                                                                                                                                                                                                       |                   |
| 41 |                                 |     |                                                                                                                                                                                                                                                                                                                                       |                   |
| 42 |                                 |     |                                                                                                                                                                                                                                                                                                                                       |                   |
| 43 |                                 |     |                                                                                                                                                                                                                                                                                                                                       |                   |
| 44 |                                 |     |                                                                                                                                                                                                                                                                                                                                       |                   |
| 45 |                                 |     |                                                                                                                                                                                                                                                                                                                                       |                   |
| 46 |                                 |     |                                                                                                                                                                                                                                                                                                                                       |                   |



|    |                               |     |                                                                                                                                                                                                                                                                                     |                                    |
|----|-------------------------------|-----|-------------------------------------------------------------------------------------------------------------------------------------------------------------------------------------------------------------------------------------------------------------------------------------|------------------------------------|
| 1  | Consent or assent             | 26a | Who will obtain informed consent or assent from potential trial participants or authorised surrogates, and how (see Item 32)                                                                                                                                                        | <u>12</u>                          |
| 2  |                               |     |                                                                                                                                                                                                                                                                                     |                                    |
| 3  |                               |     |                                                                                                                                                                                                                                                                                     |                                    |
| 4  |                               | 26b | Additional consent provisions for collection and use of participant data and biological specimens in ancillary studies, if applicable                                                                                                                                               | <u>11</u>                          |
| 5  |                               |     |                                                                                                                                                                                                                                                                                     |                                    |
| 6  |                               |     |                                                                                                                                                                                                                                                                                     |                                    |
| 7  | Confidentiality               | 27  | How personal information about potential and enrolled participants will be collected, shared, and maintained in order to protect confidentiality before, during, and after the trial                                                                                                | <u>12, 13</u>                      |
| 8  |                               |     |                                                                                                                                                                                                                                                                                     |                                    |
| 9  |                               |     |                                                                                                                                                                                                                                                                                     |                                    |
| 10 | Declaration of interests      | 28  | Financial and other competing interests for principal investigators for the overall trial and each study site                                                                                                                                                                       | <u>15, 16, 17</u>                  |
| 11 |                               |     |                                                                                                                                                                                                                                                                                     |                                    |
| 12 |                               |     |                                                                                                                                                                                                                                                                                     |                                    |
| 13 | Access to data                | 29  | Statement of who will have access to the final trial dataset, and disclosure of contractual agreements that limit such access for investigators                                                                                                                                     | <u>11, 16</u>                      |
| 14 |                               |     |                                                                                                                                                                                                                                                                                     |                                    |
| 15 |                               |     |                                                                                                                                                                                                                                                                                     |                                    |
| 16 | Ancillary and post-trial care | 30  | Provisions, if any, for ancillary and post-trial care, and for compensation to those who suffer harm from trial participation                                                                                                                                                       | <u>12</u>                          |
| 17 |                               |     |                                                                                                                                                                                                                                                                                     |                                    |
| 18 |                               |     |                                                                                                                                                                                                                                                                                     |                                    |
| 19 |                               |     |                                                                                                                                                                                                                                                                                     |                                    |
| 20 | Dissemination policy          | 31a | Plans for investigators and sponsor to communicate trial results to participants, healthcare professionals, the public, and other relevant groups (eg, via publication, reporting in results databases, or other data sharing arrangements), including any publication restrictions | <u>13</u>                          |
| 21 |                               |     |                                                                                                                                                                                                                                                                                     |                                    |
| 22 |                               |     |                                                                                                                                                                                                                                                                                     |                                    |
| 23 |                               |     |                                                                                                                                                                                                                                                                                     |                                    |
| 24 |                               | 31b | Authorship eligibility guidelines and any intended use of professional writers                                                                                                                                                                                                      | <u>14</u>                          |
| 25 |                               |     |                                                                                                                                                                                                                                                                                     |                                    |
| 26 |                               | 31c | Plans, if any, for granting public access to the full protocol, participant-level dataset, and statistical code                                                                                                                                                                     | <u>Suppl.(protocol)</u>            |
| 27 |                               |     |                                                                                                                                                                                                                                                                                     |                                    |
| 28 |                               |     |                                                                                                                                                                                                                                                                                     |                                    |
| 29 | <b>Appendices</b>             |     |                                                                                                                                                                                                                                                                                     |                                    |
| 30 |                               |     |                                                                                                                                                                                                                                                                                     |                                    |
| 31 | Informed consent materials    | 32  | Model consent form and other related documentation given to participants and authorised surrogates                                                                                                                                                                                  | <u>Suppl. (model consent form)</u> |
| 32 |                               |     |                                                                                                                                                                                                                                                                                     |                                    |
| 33 |                               |     |                                                                                                                                                                                                                                                                                     |                                    |
| 34 | Biological specimens          | 33  | Plans for collection, laboratory evaluation, and storage of biological specimens for genetic or molecular analysis in the current trial and for future use in ancillary studies, if applicable                                                                                      | <u>11</u>                          |
| 35 |                               |     |                                                                                                                                                                                                                                                                                     |                                    |
| 36 |                               |     |                                                                                                                                                                                                                                                                                     |                                    |

37 \*It is strongly recommended that this checklist be read in conjunction with the SPIRIT 2013 Explanation & Elaboration for important clarification on the items.  
 38 Amendments to the protocol should be tracked and dated. The SPIRIT checklist is copyrighted by the SPIRIT Group under the Creative Commons  
 39 "[Attribution-NonCommercial-NoDerivs 3.0 Unported](#)" license.  
 40
